# Supplementary material for: Regulation of solid-state dual-emission properties by switching luminescence processes based on a bis-o-carborane-modified anthracene triad
Source: Royal Society of Chemistry journal article supplement (doi:10.1039/d2qm00211f), 2022-01-01
Supplement: d2qm00211f1.pdf [file d2qm00211f1.pdf]

## Supporting Information

Regulation of Solid-state Dual-emission Properties by Switching Luminescent Processes Based on the Bis-*o*-carborane-modified Anthracene Triad

Kazuhiro Yuhara, Kazuo Tanaka\* and Yoshiki Chujo

Department of Polymer Chemistry, Graduate School of Engineering, Kyoto University  
Katsura, Nishikyo-ku, Kyoto 615-8510, Japan

E-mail: [tanaka@poly.synchem.kyoto-u.ac.jp](mailto:tanaka@poly.synchem.kyoto-u.ac.jp)

## General

$^1\text{H}$ ,  $^{13}\text{C}$ , and  $^{11}\text{B}$  NMR spectra were recorded on a JEOL JNM-AL400 instrument at 400, 100, and 128 MHz, respectively. The  $^1\text{H}$  and  $^{13}\text{C}$  chemical shift values were expressed relative to non-deuterated solvent in  $\text{CD}_2\text{Cl}_2$  as an internal standard. The  $^{11}\text{B}$  chemical shift values were expressed relative to  $\text{BF}_3 \cdot \text{Et}_2\text{O}$  as an external standard. Analytical thin-layer chromatography (TLC) was performed with silica gel 60 Merck F254 plates. Column chromatography was performed with Wakogel® C-300 silica gel. High-resolution mass spectrometry (HRMS) was performed at the Technical Support Office (Department of Synthetic Chemistry and Biological Chemistry, Graduate School of Engineering, Kyoto University), and the HRMS spectra were obtained on a Thermo Fisher Scientific Exactive Plus for atmospheric pressure chemical ionization (APCI). UV-vis absorption and diffusion reflectance spectra were obtained on a SHIMADZU UV3600i plus spectrophotometer. Photoluminescence (PL) spectra were measured with a HORIBA JOBIN YVON Fluorolog-3 spectrofluorometer and an Oxford Optistat DN for temperature control. The fluorescence quantum yield (QY) was recorded on a HAMAMATSU Quantaaurus-QY Plus C13534-01 model. The PL lifetime and time resolved emission spectra measurement was performed on a Horiba FluoroCube spectrofluorometer system; excitation was carried out using a UV diode laser (NanoLED 369 nm). The X-ray crystallographic analysis was carried out by a Rigaku Saturn 724+ with MicroMax-007 HF CCD diffractometer with Varimax Mo optics using graphite-monochromated Mo  $\text{K}\alpha$  radiation. The structures were solved with SHELXT 2015<sup>1</sup> and refined on  $F^2$  with SHELXL 2015<sup>2</sup> on Olex 2-1.2.<sup>3</sup> All hydrogen atoms were placed at calculated positions and refined using a riding model. The program ORTEP-3<sup>4</sup> was used to generate the X-ray structural diagram. Thermogravimetric analyses (TGA) were performed by a HITACHI STA 7200RV instrument with the aluminum pan and the heating rate of 10 °C/min. up to 500 °C under nitrogen flow (200 mL/min). Differential scanning calorimetry (DSC) measurements were carried out on a HITACHI DSC 7020 instrument with the aluminum pan and the heating rate of 10 °C/min under nitrogen flow (50 mL/min). Powder X-ray diffraction (PXRD) data were collected with a Rigaku SmartLab Diffractometer (sealed tube (50 kV, 40 mA); Cu  $\text{K}\alpha$ , 1.542 Å; Bragg-Brentano geometry). PXRD samples were placed on a single-crystal silicon substrate.

## Materials

### Commercially available compounds used without purification

1,8-Diiodoanthracene,  $\text{B}_{10}\text{H}_{14}$ , *N,N*-dimethylaniline and polystyrene.

### Commercially available solvents

Toluene,  $\text{CHCl}_3$ ,  $\text{CH}_2\text{Cl}_2$ , MeOH, *n*-hexane,  $\text{CCl}_4$ , cyclohexane,  $\text{CDCl}_3$  and  $\text{CD}_2\text{Cl}_2$ .

Compounds prepared as described in the literatures

1,8-Diethynylantracene<sup>5</sup>.

### Synthetic Procedures

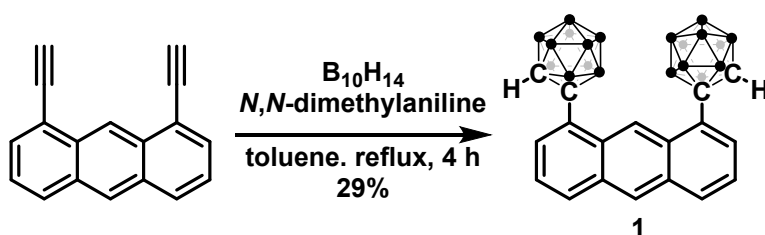

**Scheme S1.** Synthesis of **1**.

**Synthesis of 1.** Synthesis of **1** was performed according to Scheme S1. In the 100 mL round bottom flask, 1,8-diethynylantracene (624 mg, 2.76 mmol), decaborane (779 mmol, 3.44 mmol) and *N,N*-dimethylaniline (1.25 mL, 9.90 mmol) were dissolved in toluene (27.6 mL) under  $N_2$  atmosphere. The reaction mixture was stirred by magnetic stirrer and refluxed for 4.5 h. After filtration to remove any insoluble impurities, the solvent was removed by a rotary evaporator. The crude product was purified by column chromatography (eluent:  $CH_2Cl_2/n$ -hexane 1/5 (v/v)) to give a yellow solid. Recrystallization of the residual solid from  $CCl_4$  at 60 °C afforded **1a** (80 mg, 0.17 mmol, 6% isolated yield) as a yellow solid and that from  $CHCl_3$  at 60 °C afforded **1c** (369 mg, 0.63 mmol, 23% isolated yield) as a light-yellow solid. **1b** and **1d** were prepared by recrystallization of the crude product from toluene at 110 °C and cyclohexane at 85 °C, respectively. Both **1b** (14 mg, 0.03 mmol) and **1d** (41 mg, 0.07 mmol) were obtained as a light-yellow solid.  $^1H$  NMR (400MHz,  $CD_2Cl_2$ ):  $\delta$  (ppm) 9.60 (s, 1H), 8.57 (s, 1H), 8.08 (d,  $J = 8.3$  Hz, 2H), 7.94 (dd,  $J = 7.4, 0.9$  Hz, 2H), 7.46 (dd,  $J = 8.2, 7.6$  Hz, 2H), 4.81 (s, 2H), 3.77–1.63 (br, 20H).  $^{13}C$  NMR (100 MHz,  $CD_2Cl_2$ ):  $\delta$  (ppm) 132.34, 132.10, 130.77, 130.64, 129.28, 128.59, 124.96, 119.86, 78.17, 62.07.  $^{11}B$  NMR (128 MHz,  $CD_2Cl_2$ ): -3.34, -8.44, -9.62, -10.89, -12.56, -13.84. HRMS (p-APCI): calcd. for  $C_{18}H_{30}B_{20}^+Cl^-$   $[M+Cl]^-$  501.3946, found 501.3950. Anal. Calcd for  $C_{18}H_{30}B_{20}$ : C, 46.73; H, 6.54. Found: C, 46.52; H, 6.60.

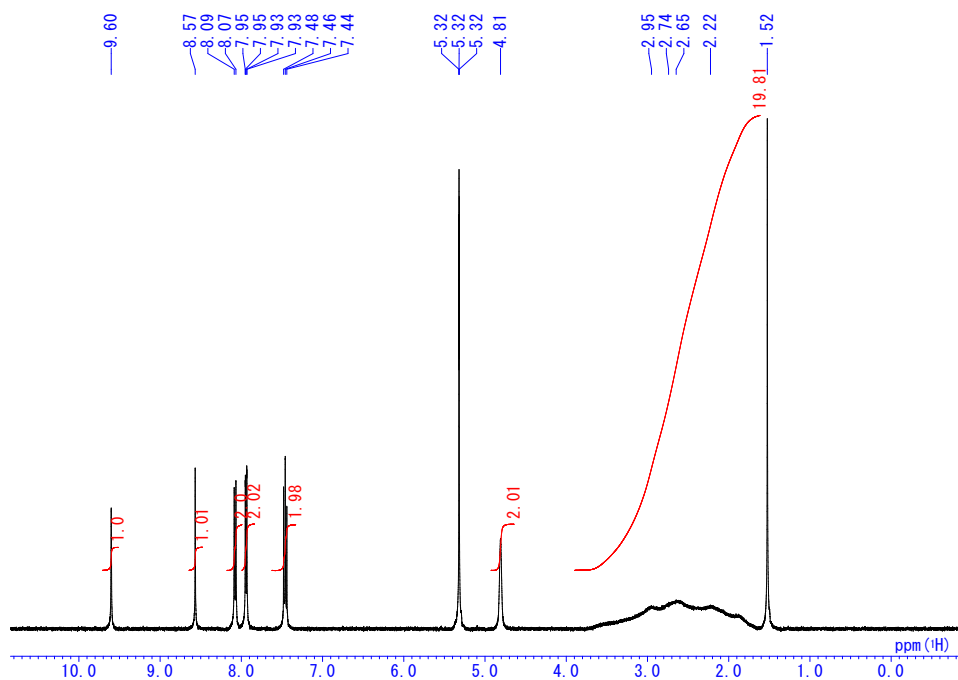

**Chart S1.**  $^1\text{H}$  NMR spectrum of **1a** in  $\text{CD}_2\text{Cl}_2$ .

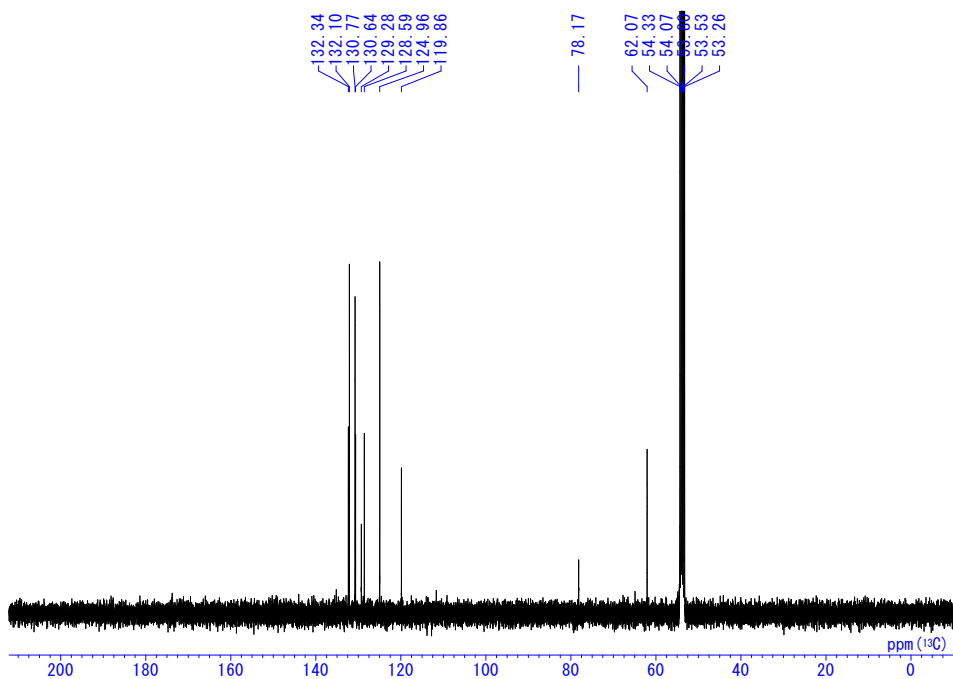

**Chart S2.**  $^{13}\text{C}$  NMR spectrum of **1a** in  $\text{CD}_2\text{Cl}_2$ .

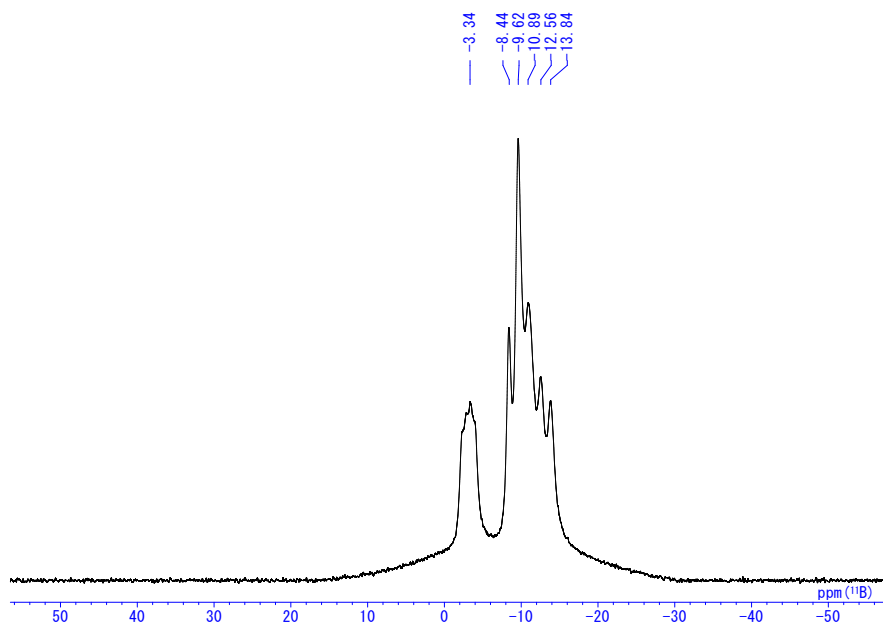

**Chart S3.**  $^{11}\text{B}$  NMR spectrum of **1a** in  $\text{CD}_2\text{Cl}_2$ .

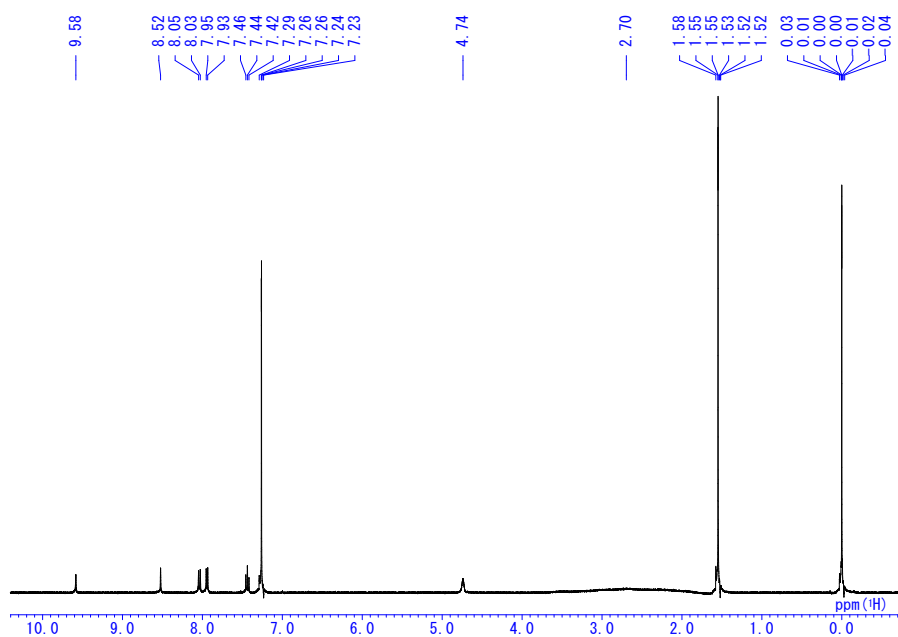

**Chart S4.**  $^1\text{H}$  NMR spectrum of **1a** in  $\text{CDCl}_3$ .

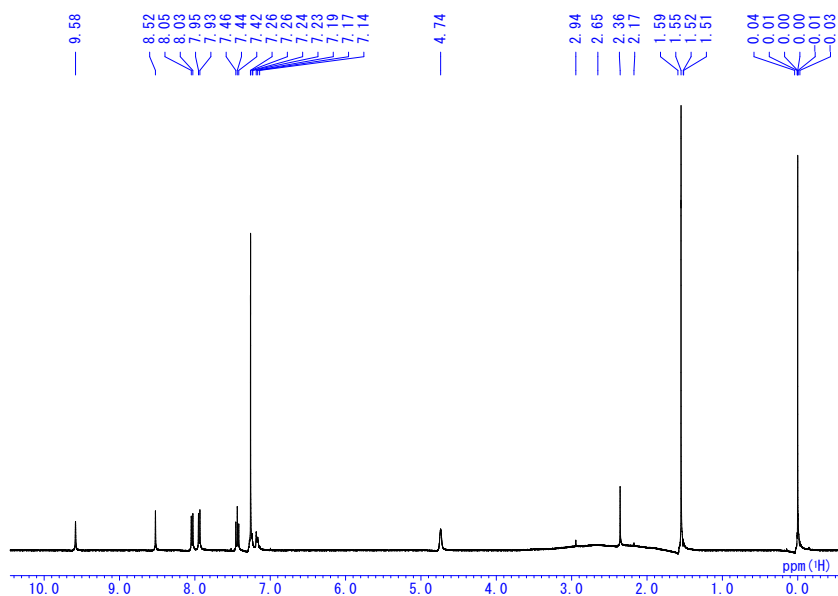

**Chart S5.**  $^1\text{H}$  NMR spectrum of **1b** in  $\text{CDCl}_3$ .

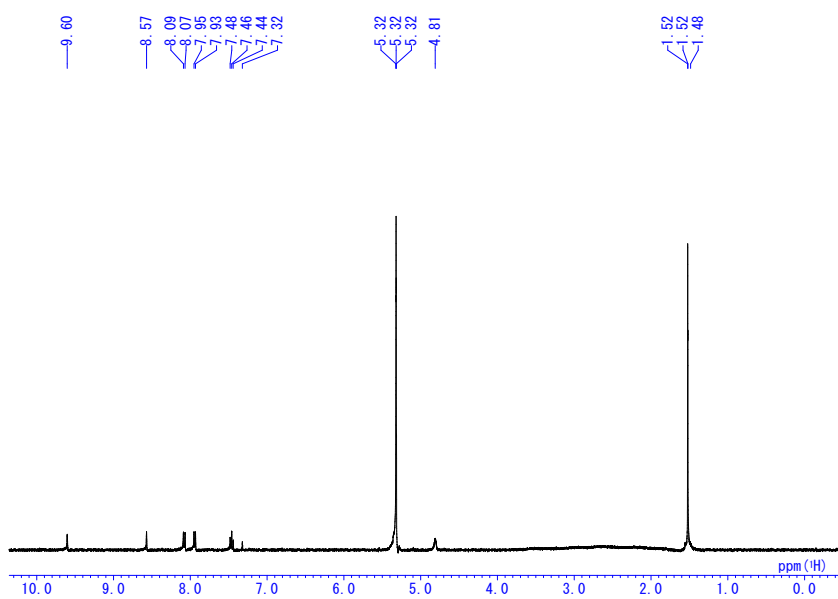

**Chart S6.**  $^1\text{H}$  NMR spectrum of **1c** in  $\text{CD}_2\text{Cl}_2$ .

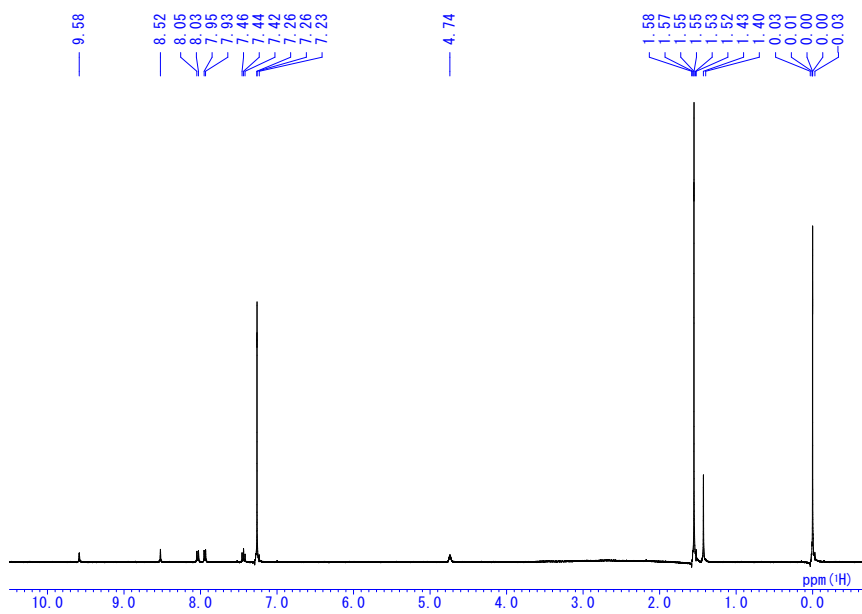

**Chart S7.**  $^1\text{H}$  NMR spectrum of **1d** in  $\text{CDCl}_3$ .

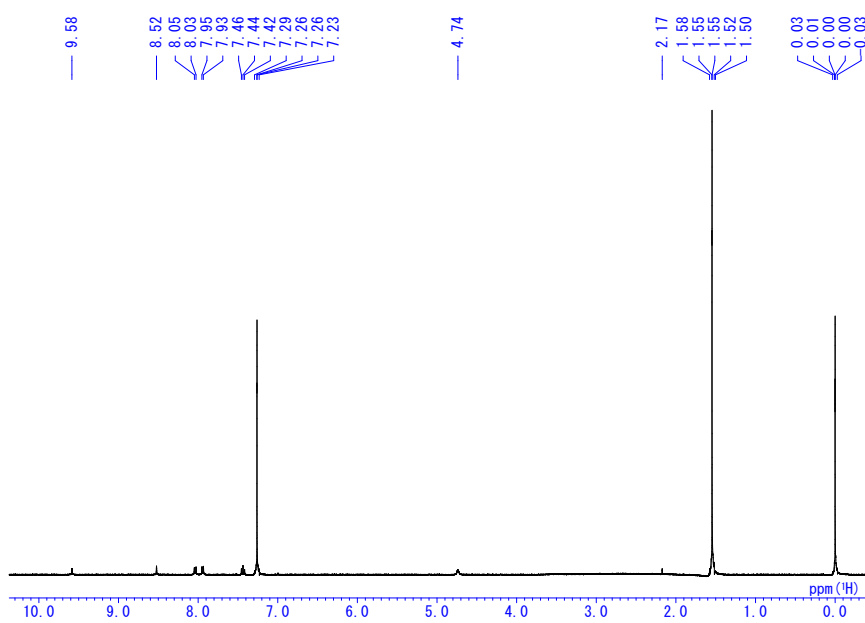

**Chart S8.**  $^1\text{H}$  NMR spectrum of **1a** after heating in  $\text{CDCl}_3$ .

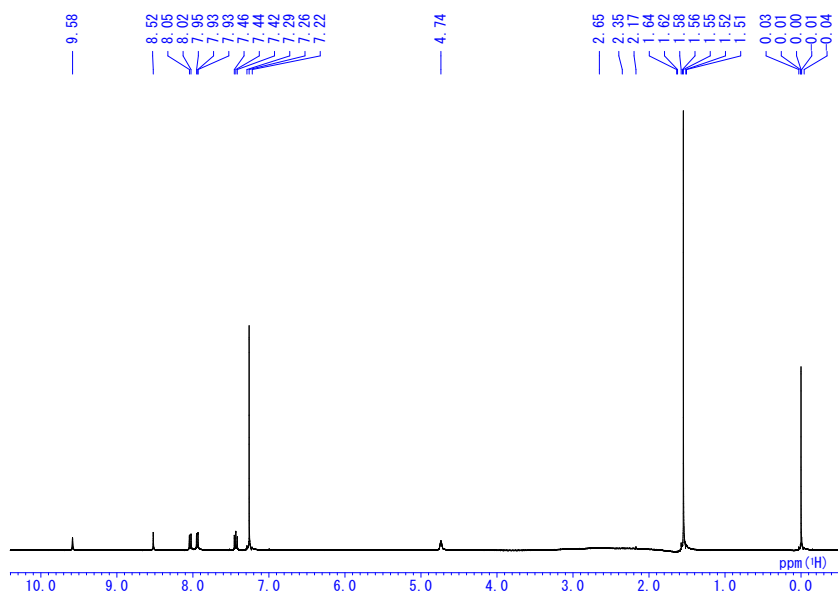

**Chart S9.**  $^1\text{H}$  NMR spectrum of **1b** after heating in  $\text{CDCl}_3$ .

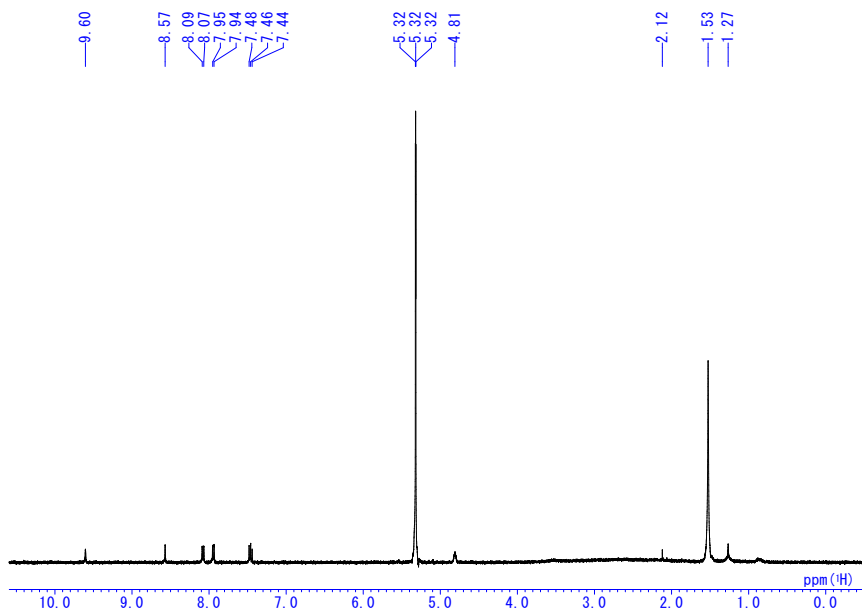

**Chart S10.**  $^1\text{H}$  NMR spectrum of **1c** after heating in  $\text{CD}_2\text{Cl}_2$ .



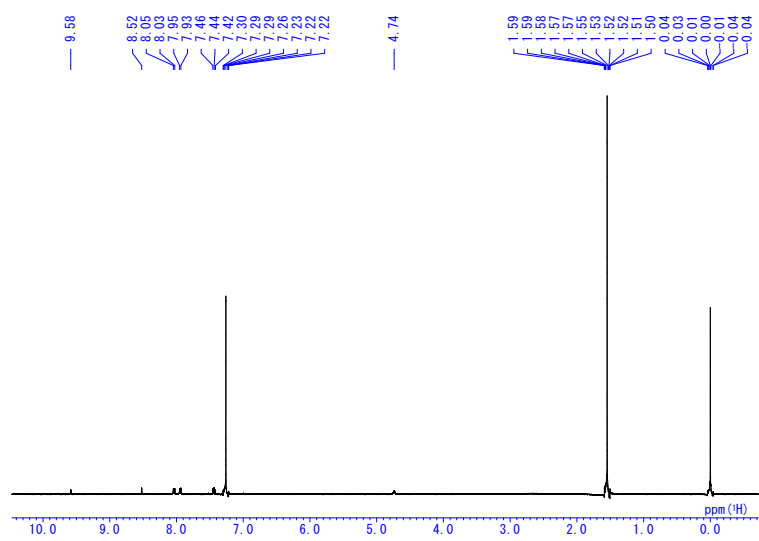

**Chart S11.**  $^1\text{H}$  NMR spectrum of **1d** after heating in  $\text{CDCl}_3$ .

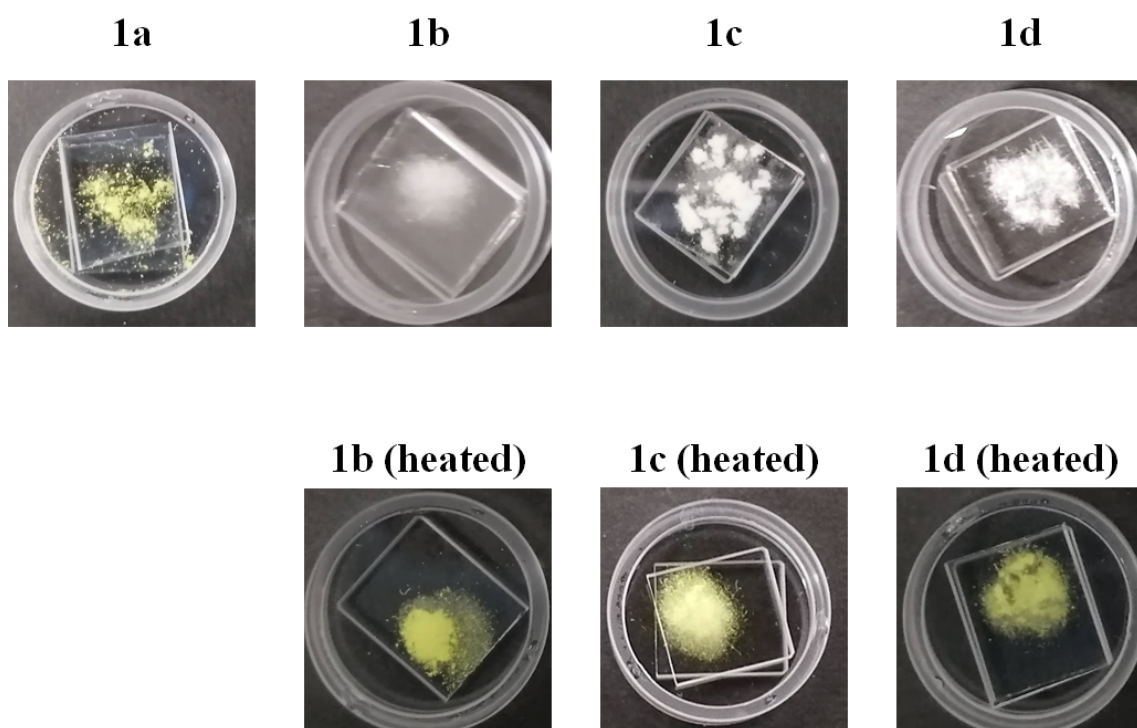

**Figure S1.** Appearances of **1a–1d** and **1b–1d** after heating at 200 °C for 5 min.

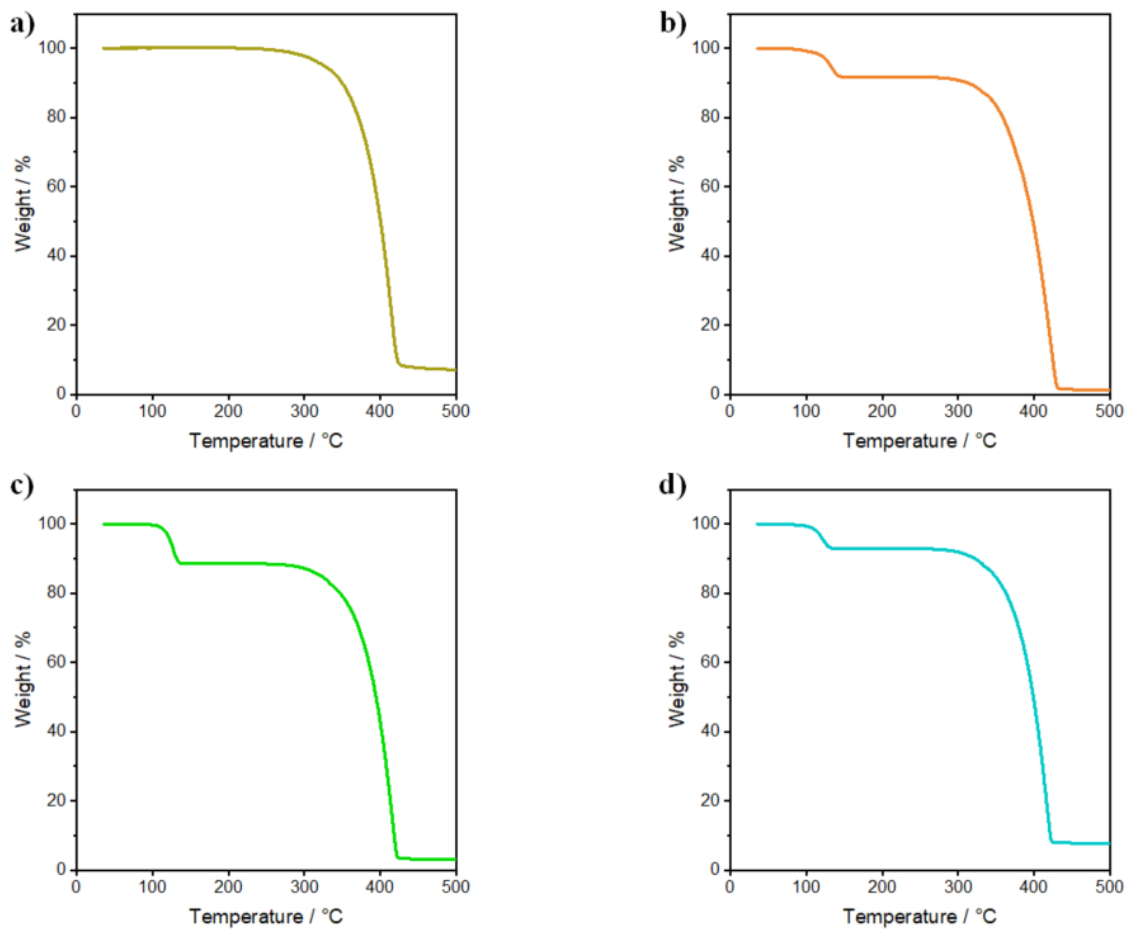

**Figure S2.** TGA profiles of **1a–1d** under nitrogen flow.

**Table S1.** Thermal properties of the crystal polymorphs

|                         | <b>1a</b>         | <b>1b</b> | <b>1c</b> | <b>1d</b> |
|-------------------------|-------------------|-----------|-----------|-----------|
| $T_p$ (°C) <sup>a</sup> | n.d. <sup>c</sup> | 156       | 129       | 143       |
| $T_d$ (°C) <sup>b</sup> | 377               | 372       | 375       | 376       |

<sup>a</sup>Phase transition temperature determined with DSC.

<sup>b</sup>Thermal degradation temperature determined with TGA.

<sup>c</sup>n.d. = not detected.

**Table S2.** The amount of the included solvents

|                                              | <b>1b</b> | <b>1c</b>      | <b>1d</b>      |
|----------------------------------------------|-----------|----------------|----------------|
| SCXRD (molar ratio (1/solvent)) <sup>a</sup> | 0.50      | — <sup>c</sup> | — <sup>c</sup> |
| TGA (molar ratio (1/solvent)) <sup>b</sup>   | 0.45      | 0.48           | 0.42           |

<sup>a</sup>Determined with diffraction data of the single-crystal X-ray analysis.

<sup>b</sup>Determined with weight loss of the TGA.

<sup>c</sup>Single-crystal which is suitable for an X-ray analysis couldn't be obtained.

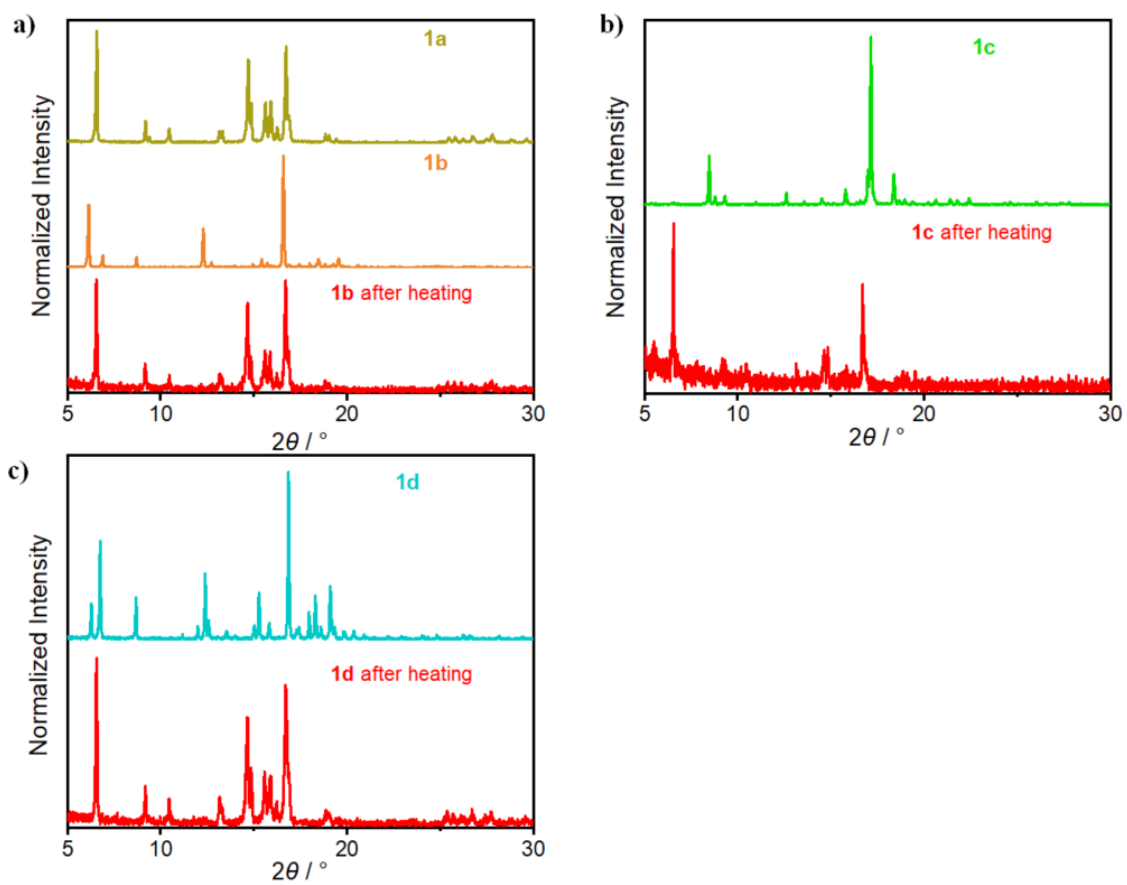

**Figure S3.** PXRD patterns of **1a–1d** before and after heating at 200 °C.

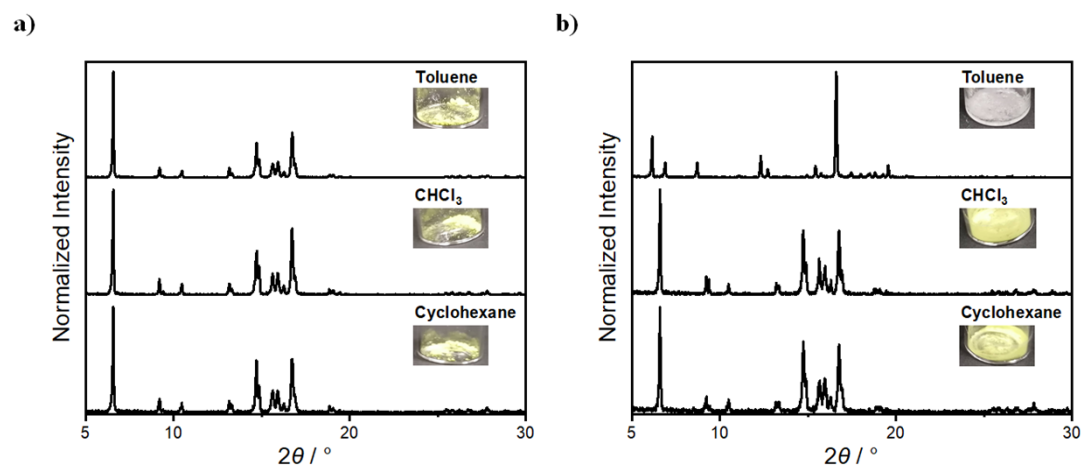

**Figure S4.** PXRd patterns of **1a** a) exposed to solvent vapor to 30 min and b) immersed to solvents. Inserted pictures are corresponding crystals after treatments.

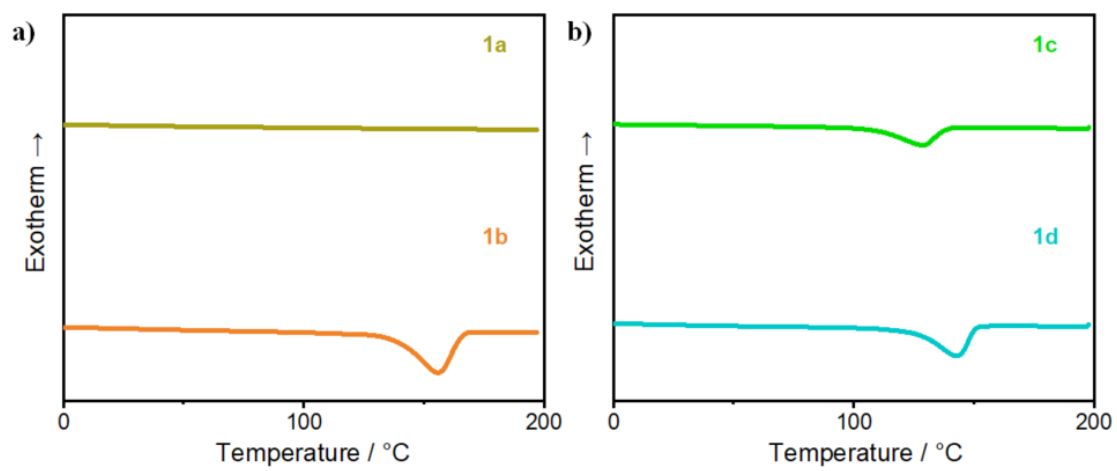

**Figure S5.** DSC profiles of **1a–1d**.

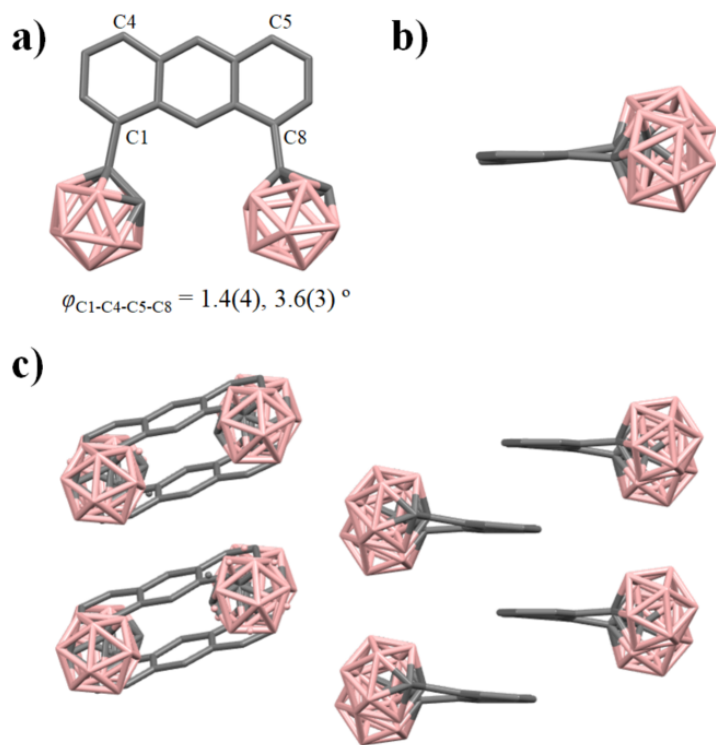

**Figure S6.** Crystal Structure of **1a**. a) Top, b) side views of molecular structure and c) Packing structure.



**Table S3.** Crystallographic data of **1a** (CCDC: 2155816)

|                                                |                                                            |                                                                                     |
|------------------------------------------------|------------------------------------------------------------|-------------------------------------------------------------------------------------|
| Empirical formula                              | C <sub>18</sub> H <sub>30</sub> B <sub>20</sub>            | 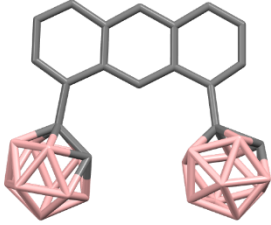 |
| Formula weight                                 | 462.62                                                     |                                                                                     |
| Temperature (K)                                | 143(2)                                                     |                                                                                     |
| Wavelength (Å)                                 | 0.71075                                                    |                                                                                     |
| Crystal system, space group                    | Triclinic, $P\bar{1}$                                      |                                                                                     |
| Unit cell dimensions                           | $a = 7.115(6)$                                             |                                                                                     |
|                                                | $b = 18.754(18)$                                           |                                                                                     |
|                                                | $c = 19.216(16)$                                           |                                                                                     |
|                                                | $\alpha = 89.60(3)$                                        |                                                                                     |
|                                                | $\beta = 83.73(4)$                                         |                                                                                     |
|                                                | $\gamma = 87.73(3)$                                        |                                                                                     |
| $V$ (Å <sup>3</sup> )                          | 2547(4)                                                    |                                                                                     |
| $Z$ , calculated density (Mg m <sup>-3</sup> ) | 4, 1.207                                                   |                                                                                     |
| Absorption coefficient                         | 0.056                                                      |                                                                                     |
| $F(000)$                                       | 952                                                        |                                                                                     |
| Crystal size (mm)                              | 0.20 × 0.06 × 0.06                                         |                                                                                     |
| $\theta$ range for data collection             | 3.042 – 27.464                                             |                                                                                     |
| Limiting indices                               | $-8 \leq h \leq 9, -23 \leq k \leq 24, -23 \leq l \leq 24$ |                                                                                     |
| Reflections collected (unique)                 | 16814/2340 [ $R(\text{int}) = 0.1360$ ]                    |                                                                                     |
| Goodness-on-fit on $F^2$                       | 0.971                                                      |                                                                                     |
| Final $R$ indices [ $I > 2\sigma(I)$ ]         | $R_1 = 0.1751, wR_2 = 0.4055$                              |                                                                                     |
| $R$ indices (all data)                         | $R_1 = 0.2777, wR_2 = 0.4529$                              |                                                                                     |

**Table S4.** Crystallographic data of **1b** (CCDC: 2155817)

|                                                     |                                                                  |                                                                                     |
|-----------------------------------------------------|------------------------------------------------------------------|-------------------------------------------------------------------------------------|
| Empirical formula                                   | C <sub>18</sub> H <sub>30</sub> B <sub>20</sub>                  | 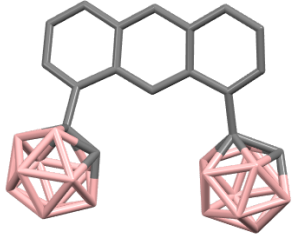 |
| Formula weight                                      | 462.62                                                           |                                                                                     |
| Temperature (K)                                     | 143(2)                                                           |                                                                                     |
| Wavelength (Å)                                      | 0.71075                                                          |                                                                                     |
| Crystal system, space group                         | monoclinic, <i>P</i> 2 <sub>1</sub> / <i>c</i>                   |                                                                                     |
| Unit cell dimensions                                | <i>a</i> = 6.926(3)                                              |                                                                                     |
|                                                     | <i>b</i> = 28.794(13)                                            |                                                                                     |
|                                                     | <i>c</i> = 14.201(7)                                             |                                                                                     |
|                                                     | $\alpha$ = 90                                                    |                                                                                     |
|                                                     | $\beta$ = 95.438(7)                                              |                                                                                     |
|                                                     | $\gamma$ = 90                                                    |                                                                                     |
| <i>V</i> (Å <sup>3</sup> )                          | 2819(2)                                                          |                                                                                     |
| <i>Z</i> , calculated density (Mg m <sup>-3</sup> ) | 4, 1.090                                                         |                                                                                     |
| Absorption coefficient                              | 0.051                                                            |                                                                                     |
| <i>F</i> (000)                                      | 952                                                              |                                                                                     |
| Crystal size (mm)                                   | 0.17 × 0.09 × 0.01                                               |                                                                                     |
| $\theta$ range for data collection                  | 3.038–27.481                                                     |                                                                                     |
| Limiting indices                                    | –8 ≤ <i>h</i> ≤ 8, –37 ≤ <i>k</i> ≤ 37, –18 ≤ <i>l</i> ≤ 18      |                                                                                     |
| Reflections collected (unique)                      | 22760/4770 [ <i>R</i> (int) = 0.1429]                            |                                                                                     |
| Goodness-on-fit on <i>F</i> <sup>2</sup>            | 1.063                                                            |                                                                                     |
| Final <i>R</i> indices [ <i>I</i> > 2σ( <i>I</i> )] | <i>R</i> <sub>1</sub> = 0.0980, w <i>R</i> <sub>2</sub> = 0.1874 |                                                                                     |
| <i>R</i> indices (all data)                         | <i>R</i> <sub>1</sub> = 0.1669, w <i>R</i> <sub>2</sub> = 0.2200 |                                                                                     |

**Table S5.** Crystallographic data of **1b** (SQUEEZE method was not performed) (CCDC: 2155817)

|                                                |                                                                                                                |  |
|------------------------------------------------|----------------------------------------------------------------------------------------------------------------|--|
| Empirical formula                              | $C_{18}H_{30}B_{20} \cdot C_4H_5$                                                                              |  |
| Formula weight                                 | 515.70                                                                                                         |  |
| Temperature (K)                                | 143(2)                                                                                                         |  |
| Wavelength (Å)                                 | 0.71075                                                                                                        |  |
| Crystal system, space group                    | monoclinic, $P2_1/c$                                                                                           |  |
| Unit cell dimensions                           | $a = 6.926(3)$<br>$b = 28.794(13)$<br>$c = 14.201(7)$<br>$\alpha = 90$<br>$\beta = 95.438(7)$<br>$\gamma = 90$ |  |
| $V$ (Å <sup>3</sup> )                          | 2819(2)                                                                                                        |  |
| $Z$ , calculated density (Mg m <sup>-3</sup> ) | 4, 1.215                                                                                                       |  |
| Absorption coefficient                         | 0.058                                                                                                          |  |
| $F(000)$                                       | 1068                                                                                                           |  |
| Crystal size (mm)                              | $0.17 \times 0.09 \times 0.01$                                                                                 |  |
| $\theta$ range for data collection             | $3.038 - 27.481$                                                                                               |  |
| Limiting indices                               | $-8 \leq h \leq 8, -37 \leq k \leq 37, -18 \leq l \leq 18$                                                     |  |
| Reflections collected (unique)                 | 22760/4770 [ $R(\text{int}) = 0.1429$ ]                                                                        |  |
| Goodness-on-fit on $F^2$                       | 1.098                                                                                                          |  |
| Final $R$ indices [ $I > 2\sigma(I)$ ]         | $R_1 = 0.1024, wR_2 = 0.1958$                                                                                  |  |
| $R$ indices (all data)                         | $R_1 = 0.1814, wR_2 = 0.2340$                                                                                  |  |

## Computational Methods

The Gaussian 16 program package<sup>8</sup> was used for structural optimization. First, optimized structures of isolated molecules in the ground  $S_0$  states and calculated their electric structures were calculated. The density functional theory (DFT) was applied for the optimization of the structures in the  $S_0$  states at the CAM-B3LYP/6-31G+(d,p) levels. The energy level of the optimized geometry was confirmed to be the local minima by performing frequency calculations and obtaining only positive frequencies.

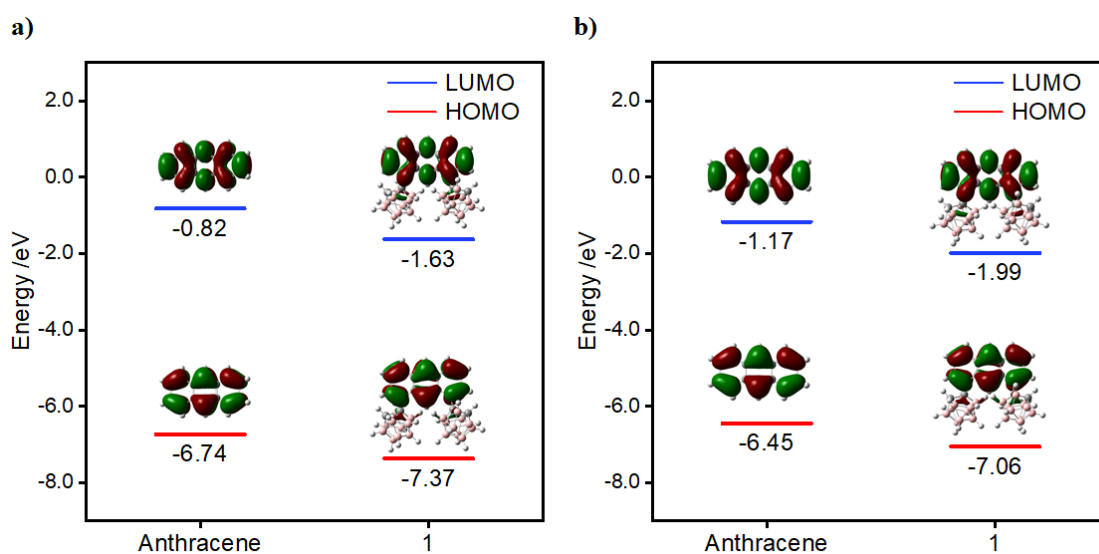

**Figure S7.** Molecular orbital distribution and energy levels of HOMO and LUMO of anthracene and **1** a) in the ground state calculated with DFT calculation b) in the excited state with TD-DFT calculation.

**Table S6.** Optimized geometry of **1** in the S<sub>0</sub> state

| Center Number | Atomic Number | Coordinates (Angstroms) |          |          |
|---------------|---------------|-------------------------|----------|----------|
|               |               | x                       | y        | z        |
| 1             | 6             | -3.52562                | 1.973791 | 0.968185 |
| 2             | 6             | -2.50777                | 1.2122   | 0.458062 |
| 3             | 6             | -1.21159                | 1.849565 | 0.246476 |
| 4             | 6             | -1.16689                | 3.283502 | 0.351537 |
| 5             | 6             | -2.29246                | 4.023975 | 0.81815  |
| 6             | 6             | -3.42717                | 3.374346 | 1.175061 |
| 7             | 6             | -2.9E-05                | 1.183251 | -1.6E-05 |
| 8             | 6             | -0.00003                | 3.9528   | -8E-06   |
| 9             | 6             | 1.166831                | 3.283503 | -0.35154 |
| 10            | 6             | 1.21154                 | 1.849562 | -0.2465  |
| 11            | 6             | 2.507736                | 1.212216 | -0.45803 |
| 12            | 6             | 3.52563                 | 1.973829 | -0.96803 |
| 13            | 6             | 3.427174                | 3.374384 | -1.1749  |
| 14            | 6             | 2.292421                | 4.023991 | -0.81808 |
| 15            | 1             | -3.4E-05                | 0.110565 | -5E-06   |
| 16            | 1             | -4.47569                | 1.522259 | 1.216411 |
| 17            | 1             | -2.20699                | 5.102539 | 0.905135 |
| 18            | 1             | -4.28067                | 3.910369 | 1.575272 |
| 19            | 1             | -2.6E-05                | 5.039143 | 0.000002 |
| 20            | 1             | 4.475732                | 1.522316 | -1.21616 |
| 21            | 1             | 4.280706                | 3.910421 | -1.57503 |
| 22            | 1             | 2.206946                | 5.102555 | -0.90507 |
| 23            | 6             | 2.816852                | -0.22849 | -0.07347 |
| 24            | 5             | 1.891283                | -1.58302 | -0.52737 |
| 25            | 5             | 2.01112                 | -1.07608 | 1.17164  |
| 26            | 5             | 3.038538                | -2.90483 | -0.79133 |
| 27            | 5             | 3.443636                | -1.27273 | -1.30319 |
| 28            | 5             | 2.143504                | -2.78668 | 0.743353 |
| 29            | 1             | 0.919903                | -1.39461 | -1.16483 |
| 30            | 5             | 3.630158                | -0.45077 | 1.452666 |
| 31            | 1             | 1.125472                | -0.54035 | 1.730961 |
| 32            | 5             | 3.225479                | -2.0818  | 1.968571 |
| 33            | 5             | 3.859998                | -3.22282 | 0.756805 |

|    |   |          |          |          |
|----|---|----------|----------|----------|
| 34 | 5 | 4.663203 | -2.27513 | -0.5028  |
| 35 | 1 | 2.827845 | -3.73841 | -1.60526 |
| 36 | 6 | 4.408461 | -0.67646 | -0.03539 |
| 37 | 1 | 3.575153 | -0.80405 | -2.37708 |
| 38 | 1 | 1.279865 | -3.54521 | 1.027646 |
| 39 | 5 | 4.776186 | -1.77524 | 1.189912 |
| 40 | 1 | 3.873036 | 0.525047 | 2.068402 |
| 41 | 1 | 3.142741 | -2.32627 | 3.124407 |
| 42 | 1 | 4.252247 | -4.30107 | 1.050966 |
| 43 | 1 | 5.645563 | -2.51917 | -1.11396 |
| 44 | 1 | 5.13489  | 0.076559 | -0.29144 |
| 45 | 1 | 5.835174 | -1.67959 | 1.70714  |
| 46 | 6 | -2.81686 | -0.2285  | 0.073461 |
| 47 | 5 | -1.89126 | -1.58302 | 0.52733  |
| 48 | 5 | -2.01111 | -1.07606 | -1.17166 |
| 49 | 5 | -3.0385  | -2.90487 | 0.791274 |
| 50 | 5 | -3.44363 | -1.27279 | 1.303164 |
| 51 | 5 | -2.14347 | -2.78667 | -0.7434  |
| 52 | 1 | -0.91989 | -1.39458 | 1.1648   |
| 53 | 5 | -3.63016 | -0.45076 | -1.45268 |
| 54 | 1 | -1.12548 | -0.5403  | -1.73098 |
| 55 | 5 | -3.22545 | -2.08178 | -1.96861 |
| 56 | 5 | -3.85995 | -3.22284 | -0.75688 |
| 57 | 5 | -4.66318 | -2.27518 | 0.50275  |
| 58 | 1 | -2.8278  | -3.73846 | 1.605182 |
| 59 | 6 | -4.40847 | -0.6765  | 0.035373 |
| 60 | 1 | -3.57515 | -0.80412 | 2.377062 |
| 61 | 1 | -1.2798  | -3.54514 | -1.02776 |
| 62 | 5 | -4.77617 | -1.77526 | -1.18996 |
| 63 | 1 | -3.87305 | 0.52507  | -2.06839 |
| 64 | 1 | -3.1427  | -2.32623 | -3.12445 |
| 65 | 1 | -4.25218 | -4.30108 | -1.05107 |
| 66 | 1 | -5.64553 | -2.51926 | 1.113907 |
| 67 | 1 | -5.1349  | 0.076517 | 0.29142  |
| 68 | 1 | -5.83515 | -1.67963 | -1.70719 |

---

**Table S7.** Optimized geometry of **1** in the S<sub>1</sub> state

| Center Number | Atomic Number | Coordinates (Angstroms) |          |          |
|---------------|---------------|-------------------------|----------|----------|
|               |               | x                       | y        | z        |
| 1             | 6             | -3.50485                | 1.932183 | 1.151239 |
| 2             | 6             | -2.47716                | 1.176542 | 0.528137 |
| 3             | 6             | -1.2193                 | 1.803496 | 0.307178 |
| 4             | 6             | -1.15861                | 3.240263 | 0.446326 |
| 5             | 6             | -2.23335                | 3.95934  | 0.976968 |
| 6             | 6             | -3.38836                | 3.286679 | 1.383739 |
| 7             | 6             | 0.000004                | 1.143578 | 0.000025 |
| 8             | 6             | -1.2E-05                | 3.90174  | 0.000003 |
| 9             | 6             | 1.158588                | 3.240269 | -0.44631 |
| 10            | 6             | 1.219304                | 1.803506 | -0.30714 |
| 11            | 6             | 2.477156                | 1.176559 | -0.52811 |
| 12            | 6             | 3.504825                | 1.932195 | -1.15125 |
| 13            | 6             | 3.38833                 | 3.286688 | -1.38377 |
| 14            | 6             | 2.23332                 | 3.959347 | -0.97698 |
| 15            | 1             | 0.000009                | 0.070114 | 0.000027 |
| 16            | 1             | -4.41088                | 1.442594 | 1.479634 |
| 17            | 1             | -2.14672                | 5.034321 | 1.096844 |
| 18            | 1             | -4.19803                | 3.824537 | 1.864211 |
| 19            | 1             | -1.9E-05                | 4.988523 | -0.00001 |
| 20            | 1             | 4.410852                | 1.442607 | -1.47967 |
| 21            | 1             | 4.197985                | 3.824545 | -1.86427 |
| 22            | 1             | 2.146676                | 5.034325 | -1.09688 |
| 23            | 6             | 2.816235                | -0.22796 | -0.08211 |
| 24            | 5             | 1.928539                | -1.62813 | -0.48035 |
| 25            | 5             | 2.030421                | -1.04754 | 1.196429 |
| 26            | 5             | 3.115118                | -2.92554 | -0.68654 |
| 27            | 5             | 3.475667                | -1.30577 | -1.26499 |
| 28            | 5             | 2.211441                | -2.76886 | 0.840053 |
| 29            | 1             | 0.951247                | -1.48773 | -1.12365 |
| 30            | 5             | 3.630455                | -0.3646  | 1.456945 |
| 31            | 1             | 1.125367                | -0.51569 | 1.730036 |
| 32            | 5             | 3.270044                | -1.98373 | 2.037308 |
| 33            | 5             | 3.94132                 | -3.15469 | 0.8748   |

|    |   |          |          |          |
|----|---|----------|----------|----------|
| 34 | 5 | 4.72091  | -2.23655 | -0.42114 |
| 35 | 1 | 2.932675 | -3.79779 | -1.46604 |
| 36 | 6 | 4.418844 | -0.6272  | -0.01991 |
| 37 | 1 | 3.598546 | -0.88037 | -2.35806 |
| 38 | 1 | 1.369334 | -3.53978 | 1.154507 |
| 39 | 5 | 4.814465 | -1.66481 | 1.250323 |
| 40 | 1 | 3.843402 | 0.642943 | 2.031757 |
| 41 | 1 | 3.189645 | -2.18257 | 3.202073 |
| 42 | 1 | 4.362871 | -4.20829 | 1.214204 |
| 43 | 1 | 5.711595 | -2.47877 | -1.01942 |
| 44 | 1 | 5.118747 | 0.141611 | -0.30395 |
| 45 | 1 | 5.86898  | -1.51903 | 1.764975 |
| 46 | 6 | -2.81623 | -0.22798 | 0.082128 |
| 47 | 5 | -1.9286  | -1.62817 | 0.480458 |
| 48 | 5 | -2.03033 | -1.04759 | -1.19633 |
| 49 | 5 | -3.11522 | -2.92555 | 0.686572 |
| 50 | 5 | -3.47578 | -1.30576 | 1.264978 |
| 51 | 5 | -2.21142 | -2.76891 | -0.83995 |
| 52 | 1 | -0.95135 | -1.48778 | 1.12384  |
| 53 | 5 | -3.63033 | -0.36462 | -1.45699 |
| 54 | 1 | -1.12522 | -0.51578 | -1.72988 |
| 55 | 5 | -3.26991 | -1.98377 | -2.0373  |
| 56 | 5 | -3.94131 | -3.15469 | -0.87483 |
| 57 | 5 | -4.72098 | -2.23652 | 0.421034 |
| 58 | 1 | -2.93286 | -3.79779 | 1.466106 |
| 59 | 6 | -4.41884 | -0.62718 | 0.019812 |
| 60 | 1 | -3.59873 | -0.88034 | 2.35803  |
| 61 | 1 | -1.36931 | -3.53985 | -1.15432 |
| 62 | 5 | -4.81439 | -1.6648  | -1.25044 |
| 63 | 1 | -3.84321 | 0.642918 | -2.03183 |
| 64 | 1 | -3.18942 | -2.18263 | -3.20205 |
| 65 | 1 | -4.36286 | -4.20829 | -1.21425 |
| 66 | 1 | -5.71172 | -2.4787  | 1.019241 |
| 67 | 1 | -5.11875 | 0.14165  | 0.303783 |
| 68 | 1 | -5.86886 | -1.519   | -1.76518 |

---



**Table S8.** Optimized geometry of anthracene in the S<sub>0</sub> state

| Center Number | Atomic Number | Coordinates (Angstroms) |          |          |
|---------------|---------------|-------------------------|----------|----------|
|               |               | x                       | y        | z        |
| 1             | 6             | 3.649237                | 0.713305 | -1.7E-05 |
| 2             | 6             | 2.47425                 | 1.403008 | 0.000041 |
| 3             | 6             | 1.218694                | 0.717403 | 0.000031 |
| 4             | 6             | 1.218695                | -0.7174  | 0.000014 |
| 5             | 6             | 2.474251                | -1.40301 | -1.7E-05 |
| 6             | 6             | 3.649238                | -0.7133  | -5.5E-05 |
| 7             | 6             | 0                       | 1.397752 | 0.000025 |
| 8             | 6             | 0.000001                | -1.39775 | 0.000019 |
| 9             | 6             | -1.2187                 | -0.7174  | 0.000019 |
| 10            | 6             | -1.2187                 | 0.717403 | 0.000009 |
| 11            | 6             | -2.47425                | 1.403008 | -2.7E-05 |
| 12            | 1             | -2.47125                | 2.489229 | -6.7E-05 |
| 13            | 6             | -3.64924                | 0.713304 | -5.1E-05 |
| 14            | 6             | -3.64924                | -0.7133  | -5E-06   |
| 15            | 6             | -2.47425                | -1.40301 | 0.00003  |
| 16            | 1             | -5E-06                  | 2.484891 | 0.000042 |
| 17            | 1             | 4.594667                | 1.246202 | -4.2E-05 |
| 18            | 1             | 2.471249                | 2.489229 | 0.000093 |
| 19            | 1             | 2.471249                | -2.48923 | -2.2E-05 |
| 20            | 1             | 4.594664                | -1.24621 | -0.00011 |
| 21            | 1             | -4E-06                  | -2.48489 | 0.000038 |
| 22            | 1             | -4.59466                | 1.246206 | -8.1E-05 |
| 23            | 1             | -4.59466                | -1.24621 | -1.7E-05 |
| 24            | 1             | -2.47125                | -2.48923 | 0.000074 |

**Table S9.** Optimized geometry of anthracene in the S<sub>1</sub> state

| Center Number | Atomic Number | Coordinates (Angstroms) |          |          |
|---------------|---------------|-------------------------|----------|----------|
|               |               | x                       | y        | z        |
| 1             | 6             | 3.689008                | -0.69255 | 0.000003 |
| 2             | 6             | 2.469942                | -1.39457 | 0.000002 |
| 3             | 6             | 1.24206                 | -0.71988 | 0.000001 |
| 4             | 6             | 1.24206                 | 0.719879 | 0        |
| 5             | 6             | 2.469942                | 1.394566 | 0        |
| 6             | 6             | 3.689008                | 0.692546 | 0.000002 |
| 7             | 6             | 0                       | -1.39493 | 0        |
| 8             | 6             | 0                       | 1.394931 | -2E-06   |
| 9             | 6             | -1.24206                | 0.719879 | -1E-06   |
| 10            | 6             | -1.24206                | -0.71988 | 0        |
| 11            | 6             | -2.46994                | -1.39457 | 0        |
| 12            | 1             | -2.47388                | -2.48061 | 0        |
| 13            | 6             | -3.68901                | -0.69255 | -1E-06   |
| 14            | 6             | -3.68901                | 0.692546 | -1E-06   |
| 15            | 6             | -2.46994                | 1.394566 | -2E-06   |
| 16            | 1             | 0                       | -2.48214 | 0        |
| 17            | 1             | 4.624701                | -1.24137 | 0.000004 |
| 18            | 1             | 2.473875                | -2.48061 | 0.000003 |
| 19            | 1             | 2.473875                | 2.480611 | -1E-06   |
| 20            | 1             | 4.624701                | 1.241372 | 0.000002 |
| 21            | 1             | 0                       | 2.482135 | -3E-06   |
| 22            | 1             | -4.6247                 | -1.24137 | 0        |
| 23            | 1             | -4.6247                 | 1.241372 | -2E-06   |
| 24            | 1             | -2.47388                | 2.480611 | -2E-06   |

**Table S10.** Result of TD-DFT calculation for **1** in the S<sub>0</sub> geometry

| <b>Excited State</b> | <b>Energy / eV</b> | <b>Wavelength / nm</b> | <b><i>f</i></b> | <b>Composition</b> | <b>Coefficient</b> |
|----------------------|--------------------|------------------------|-----------------|--------------------|--------------------|
| 1                    | 3.4598             | 358.35                 | 0.1511          | HOMO -> LUMO       | 0.69810            |
| 2                    | 4.0036             | 309.68                 | 0.0000          | HOMO-1 -> LUMO     | 0.48819            |
|                      |                    |                        |                 | HOMO -> LUMO+1     | 0.46649            |
|                      |                    |                        |                 | HOMO -> LUMO+2     | 0.16267            |
| 3                    | 4.7064             | 263.44                 | 0.1739          | HOMO-2 -> LUMO     | -0.28093           |
|                      |                    |                        |                 | HOMO-1 -> LUMO     | 0.16854            |
|                      |                    |                        |                 | HOMO -> LUMO+1     | -0.35424           |
|                      |                    |                        |                 | HOMO -> LUMO+2     | 0.49848            |

**Table S11.** Result of TD-DFT calculation for **1** in the S<sub>1</sub> geometry

| <b>Excited State</b> | <b>Energy / eV</b> | <b>Wavelength / nm</b> | <b><i>f</i></b> | <b>Composition</b> | <b>Coefficient</b> |
|----------------------|--------------------|------------------------|-----------------|--------------------|--------------------|
| 1                    | 2.8582             | 433.78                 | 0.1446          | HOMO -> LUMO       | -0.70447           |
| 2                    | 3.7532             | 330.34                 | 0.0005          | HOMO-1 -> LUMO     | -0.48259           |
|                      |                    |                        |                 | HOMO -> LUMO+1     | -0.33138           |
|                      |                    |                        |                 | HOMO -> LUMO+2     | 0.37481            |
| 3                    | 4.3322             | 286.19                 | 0.1058          | HOMO-2 -> LUMO     | 0.23507            |
|                      |                    |                        |                 | HOMO-1 -> LUMO     | -0.13361           |
|                      |                    |                        |                 | HOMO -> LUMO+1     | 0.55846            |
|                      |                    |                        |                 | HOMO -> LUMO+2     | 0.31313            |

**Table S12.** Result of TD-DFT calculation for anthracene in the S<sub>0</sub> geometry

| <b>Excited State</b> | <b>Energy / eV</b> | <b>Wavelength / nm</b> | <b><i>f</i></b> | <b>Composition</b> | <b>Coefficient</b> |
|----------------------|--------------------|------------------------|-----------------|--------------------|--------------------|
| 1                    | 3.6298             | 341.57                 | 0.0866          | HOMO-1 -> LUMO+1   | -0.11278           |
|                      |                    |                        |                 | HOMO -> LUMO       | 0.69847            |
| 2                    | 4.0970             | 302.62                 | 0.0005          | HOMO-1 -> LUMO     | 0.50189            |
|                      |                    |                        |                 | HOMO -> LUMO+1     | 0.48496            |
| 3                    | 5.1981             | 238.52                 | 0.0000          | HOMO-2 -> LUMO     | -0.42249           |
|                      |                    |                        |                 | HOMO -> LUMO+5     | 0.55892            |

**Table S13.** Result of TD-DFT calculation for anthracene in the S<sub>1</sub> geometry

| <b>Excited State</b> | <b>Energy / eV</b> | <b>Wavelength / nm</b> | <b><i>f</i></b> | <b>Composition</b> | <b>Coefficient</b> |
|----------------------|--------------------|------------------------|-----------------|--------------------|--------------------|
| 1                    | 3.0701             | 403.85                 | 0.0896          | HOMO -> LUMO       | 0.70514            |
|                      |                    |                        |                 |                    |                    |
| 2                    | 3.8885             | 318.85                 | 0.0000          | HOMO-1 -> LUMO     | 0.49383            |
|                      |                    |                        |                 | HOMO -> LUMO+1     | 0.49309            |
| 3                    | 4.8563             | 255.30                 | 0.0000          | HOMO-2 -> LUMO     | -0.46005           |
|                      |                    |                        |                 | HOMO -> LUMO+3     | -0.53015           |

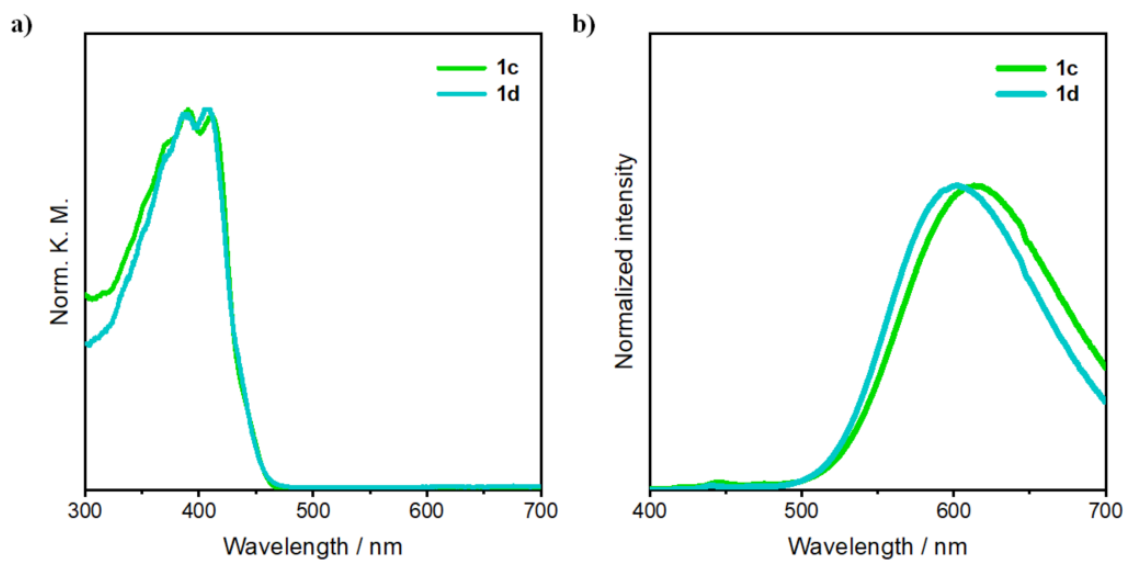

**Figure S8.** a) Diffusion reflectance and b) PL spectra of **1c** and **1d**.

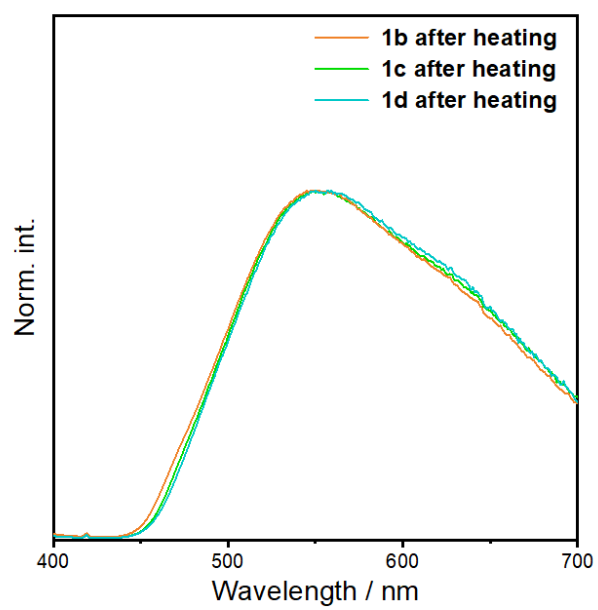

**Figure S9.** PL spectra of **1b–1d** after heating

**Table S14.** Photophysical properties of **1** in the crystalline state

| Sample                | $\lambda_{\text{PL,max}} / \text{nm}^a$ | $\tau / \text{ns}^{b,c}$                 | $\Phi^a$ |
|-----------------------|-----------------------------------------|------------------------------------------|----------|
| <b>1a</b>             | 553                                     | 53 (89.20%), 16 (10.80%)                 | 0.23     |
| <b>1b</b>             | 608                                     | 11                                       | 0.69     |
| <b>1b<sup>d</sup></b> | 548                                     | 42 (90.54%), 14 (6.65%), 0.28<br>(2.81%) | 0.23     |
| <b>1c</b>             | 613                                     | 10 (71.45%), 4.6 (28.55%)                | 0.44     |
| <b>1c<sup>d</sup></b> | 557                                     | 42 (90.04%), 15 (9.96%)                  | 0.26     |
| <b>1d</b>             | 602                                     | 12                                       | 0.65     |
| <b>1d<sup>d</sup></b> | 550                                     | 44 (87.97%), 13 (8.20%), 0.28<br>(3.83%) | 0.22     |

<sup>a</sup>Excited at 382 nm.

<sup>b</sup>Excited at 369 nm.

<sup>c</sup>Detected at  $\lambda_{\text{PL,max}}$

<sup>d</sup>After heating.

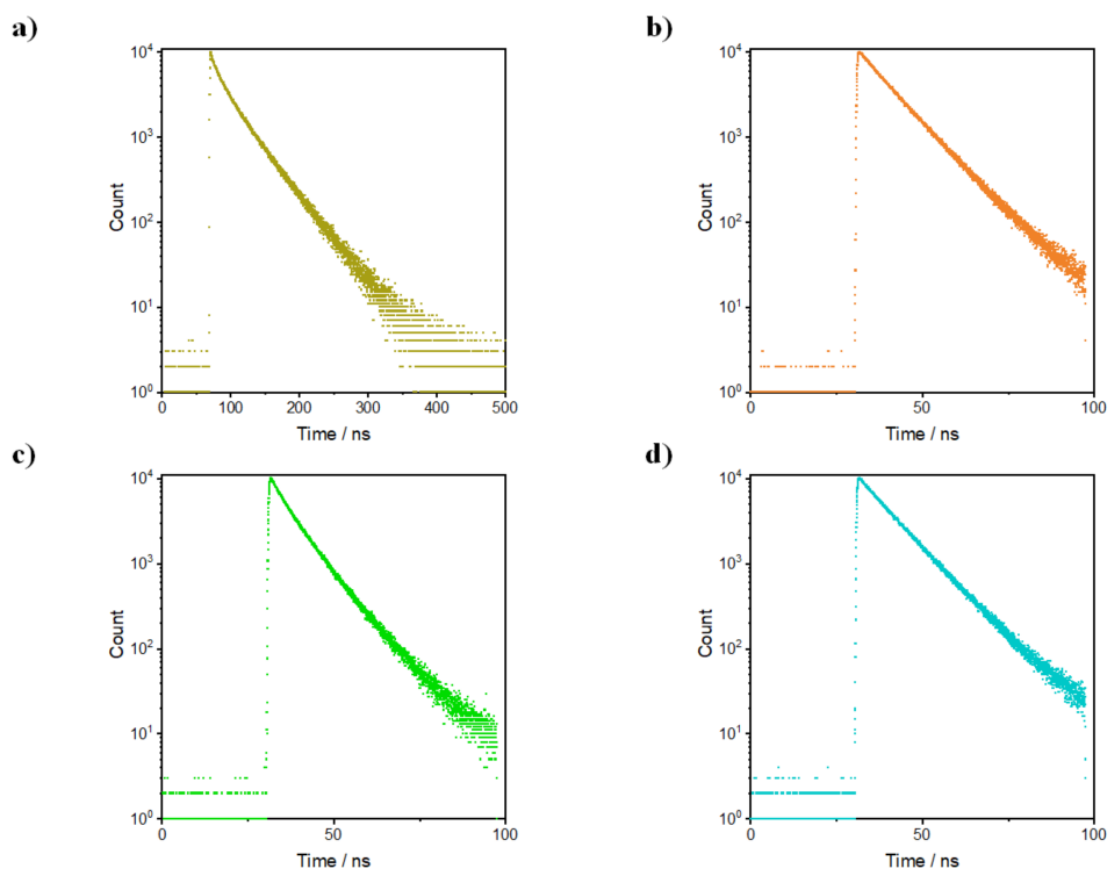

**Figure S10.** Photoluminescence decay profile of a) **1a**, b) **1b**, c) **1c** and d) **1d** (detected at  $\lambda_{\text{PL,max}}$  for all samples).



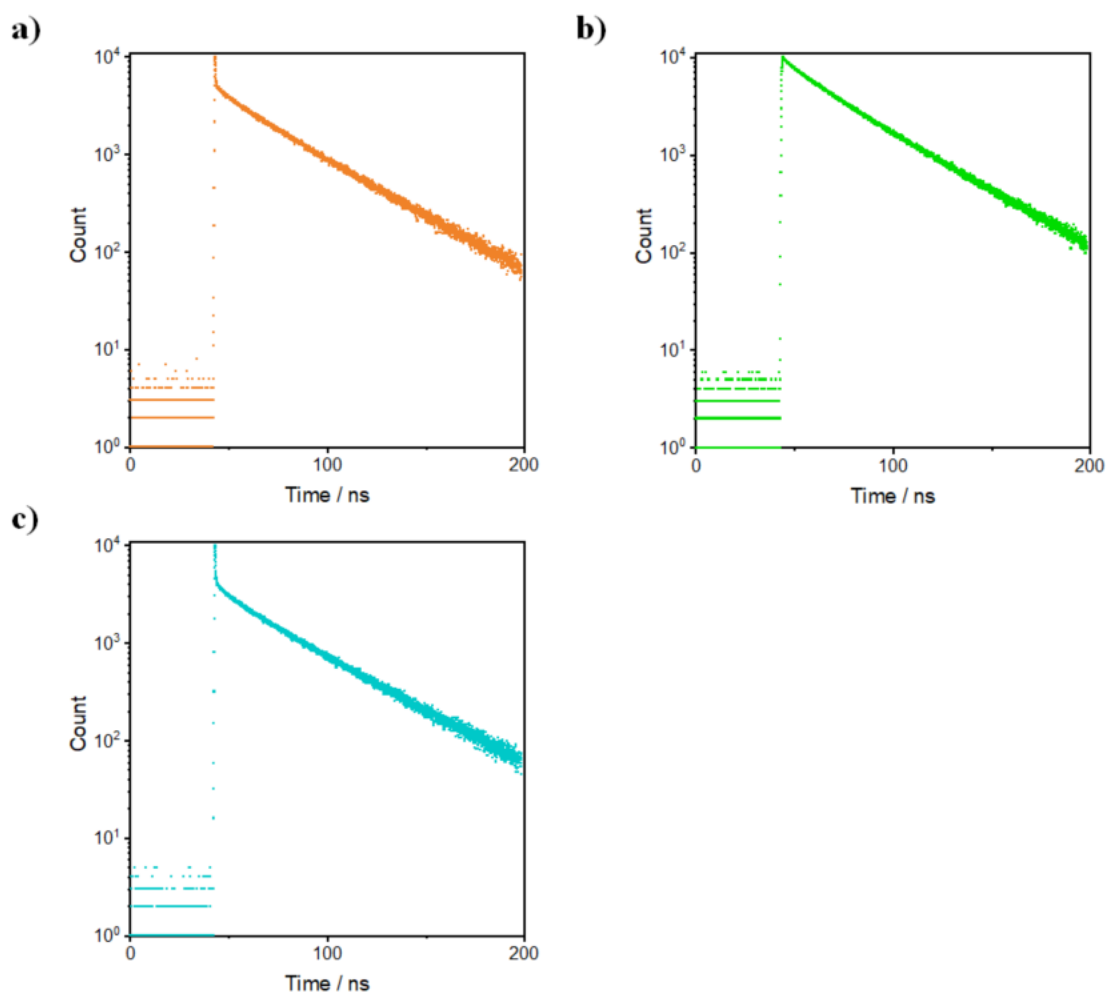

**Figure S11.** Photoluminescence decay profile of a) **1b**, b) **1c** and c) **1d** after heating (detected at  $\lambda_{\text{PL,max}}$  for all samples).

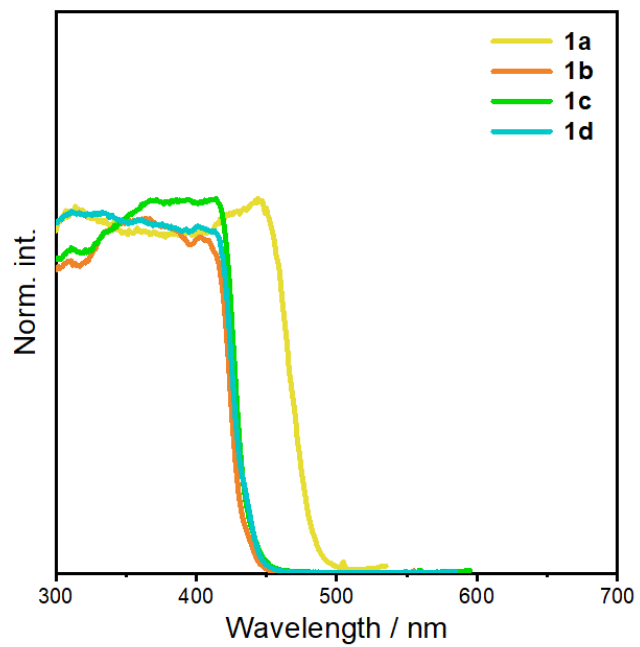

**Figure S12.** Excitation spectra of **1a–1d**. Detected at  $\lambda_{\text{PL,max}}$ .

**Table S15.** Photophysical properties of **1** in various solvents<sup>a</sup>

| Solvent           | $\lambda_{\text{abs}} / \text{nm}$ | $\varepsilon (\text{M}^{-1}\text{cm}^{-1})$ | $\lambda_{\text{PL}} / \text{nm}^b$ | $\tau / \text{ns}^{c,d}$ | $\Phi^b$ |
|-------------------|------------------------------------|---------------------------------------------|-------------------------------------|--------------------------|----------|
| Cyclohexane       | 382                                | 10390                                       | 432                                 | n.d.                     | 0.37     |
|                   |                                    |                                             | 550                                 | 6.8                      |          |
| CCl <sub>4</sub>  | 383                                | 10340                                       | 434                                 | n.d.                     | 0.36     |
|                   |                                    |                                             | 563                                 | 7.7                      |          |
| Toluene           | 383                                | 9710                                        | 435                                 | n.d.                     | 0.42     |
|                   |                                    |                                             | 610                                 | 10                       |          |
| CHCl <sub>3</sub> | 383                                | 12730                                       | 435                                 | n.d.                     | 0.33     |
|                   |                                    |                                             | 622                                 | 9.0                      |          |
| MeOH              | 380                                | 10610                                       | 431                                 | n.d.                     | 0.06     |
|                   |                                    |                                             | 675                                 | 2.0                      |          |

<sup>a</sup>1.0×10<sup>-5</sup> M.<sup>b</sup>Excited at  $\lambda_{\text{abs}}$ .<sup>c</sup>Excited at 369 nm.<sup>d</sup>Detected at  $\lambda_{\text{PL,max}}$ .<sup>e</sup>n.d. = not determined due to weak photoluminescence.

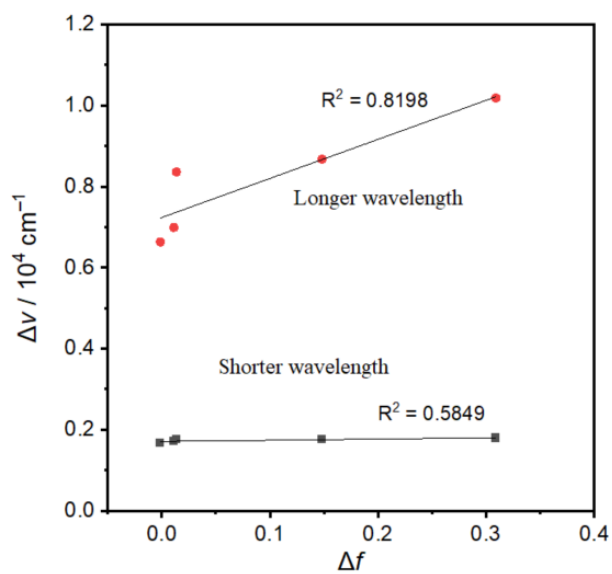

**Figure S13.** Lippert-Mataga Plot of **1**. The relationship between the solvent polarity parameter ( $\Delta f$ )<sup>a</sup> and Stokes shift ( $\Delta \nu$ )<sup>b</sup> of the absorption and emission maxima.<sup>6-7</sup> <sup>a</sup>  $\Delta f = (\epsilon - 1)/(2\epsilon + 1) - (n^2 - 1)/(2n^2 + 1)$ . <sup>b</sup>  $\Delta \nu = \nu_{em} - \nu_{abs}$ .

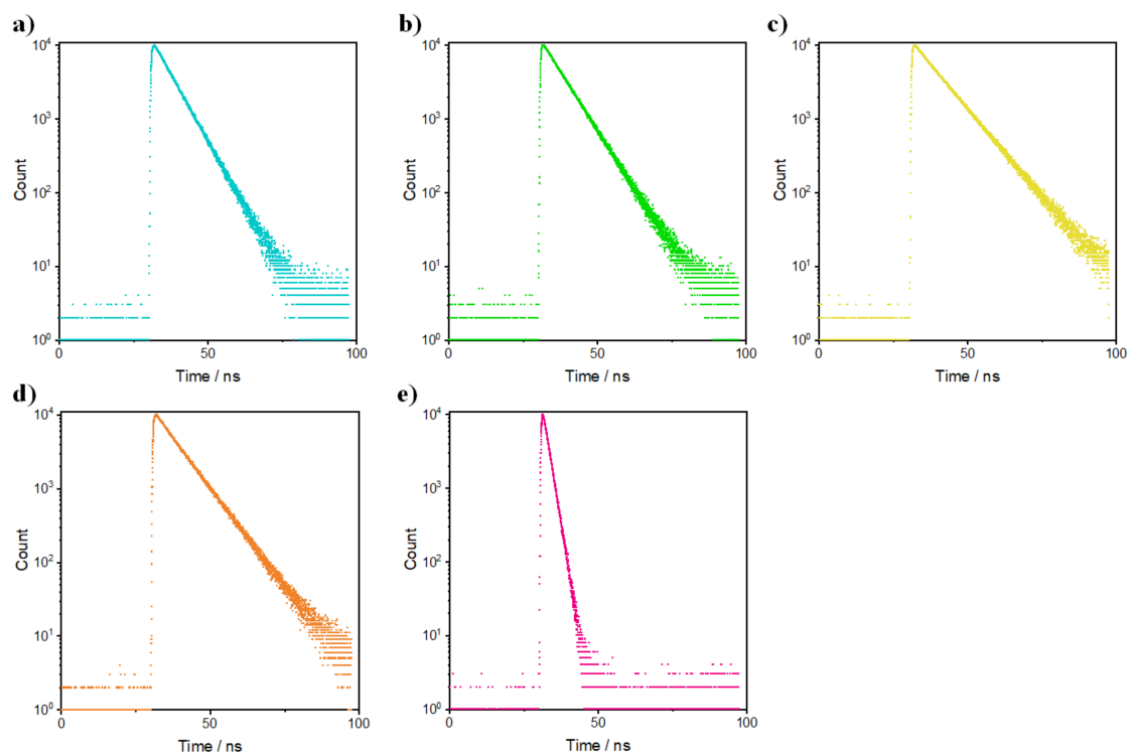

**Figure S14.** Photoluminescence decay profile of **1** in a) cyclohexane (detected at 550 nm), b)  $\text{CCl}_4$  (detected at 563 nm), c) toluene (detected at 612 nm), d)  $\text{CHCl}_3$  (detected at 622 nm) and e) MeOH (detected at 666 nm).

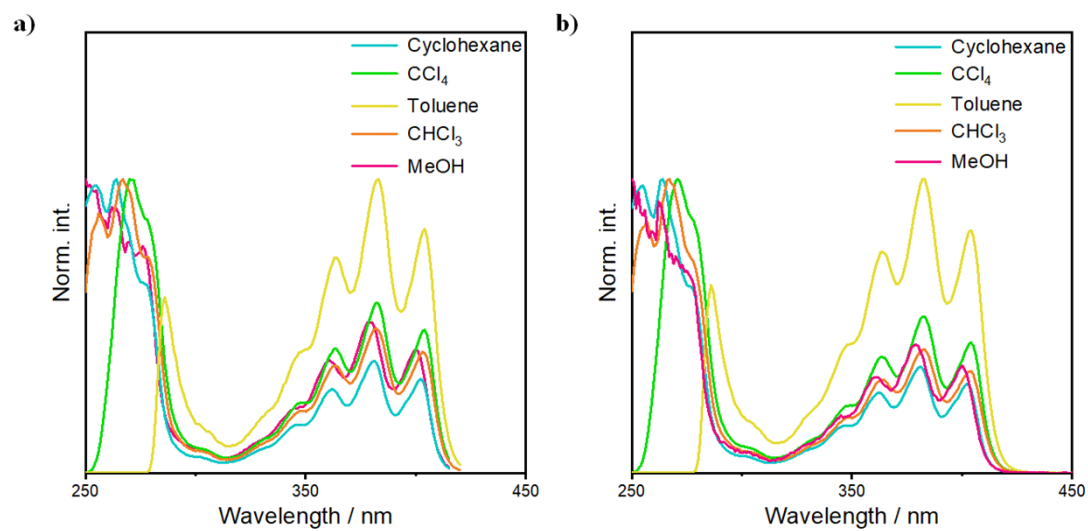

**Figure S15.** Excitation spectra of **1** in various solvents detected at a) 432 and b) 550 nm for cyclohexane, a) 434 and b) 563 nm for  $\text{CCl}_4$ , a) 436 and b) 612 nm for toluene, a) 435 and b) 622 nm for  $\text{CHCl}_3$  and a) 431 and b) 666 nm for MeOH.

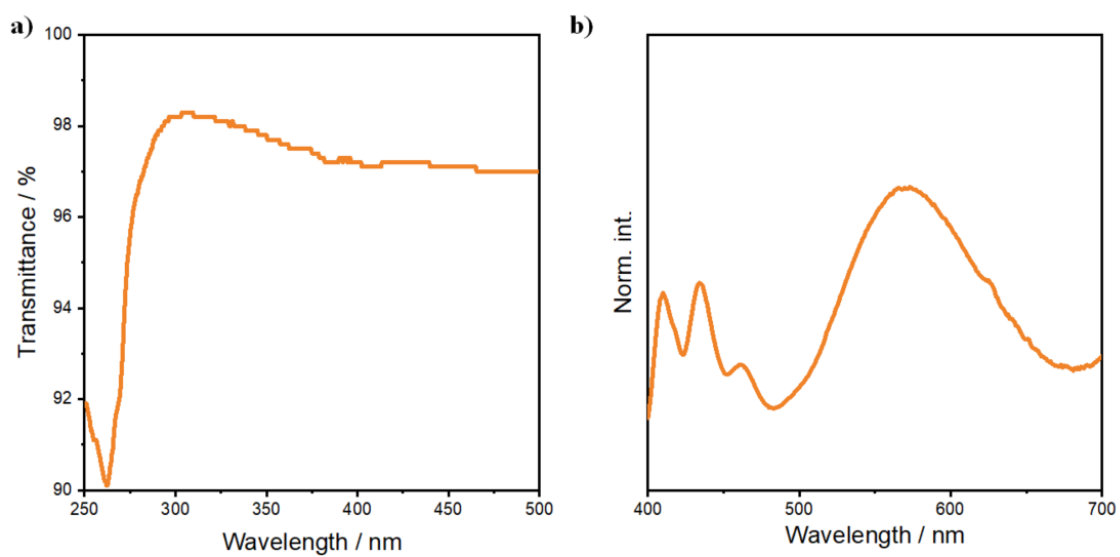

**Figure S16.** a) UV-vis transmittance and b) PL spectra of **1** dispersed in 1wt% polystyrene film. Film sample was prepared by the spin-coating (1000 rpm, 30 seconds) on the quartz substrate with  $\text{CHCl}_3$  solution of **1** and polystyrene (1 wt%).

**Table S16.** Photophysical properties of **1** dispersed in 1wt% polystyrene film

| $\lambda_{\text{PL}} / \text{nm}^a$ | $\tau / \text{ns}^{b,c}$                |
|-------------------------------------|-----------------------------------------|
| 434                                 | n.d. <sup>d</sup>                       |
| 573                                 | 12 (20.60%), 5.8 (9.75%), 0.14 (69.65%) |

<sup>a</sup>Excited at 382 nm.

<sup>b</sup>Excited at 369 nm.

<sup>c</sup>Detected at  $\lambda_{\text{PL}}$ .

<sup>d</sup>n.d. = not determined due to weak photoluminescence.



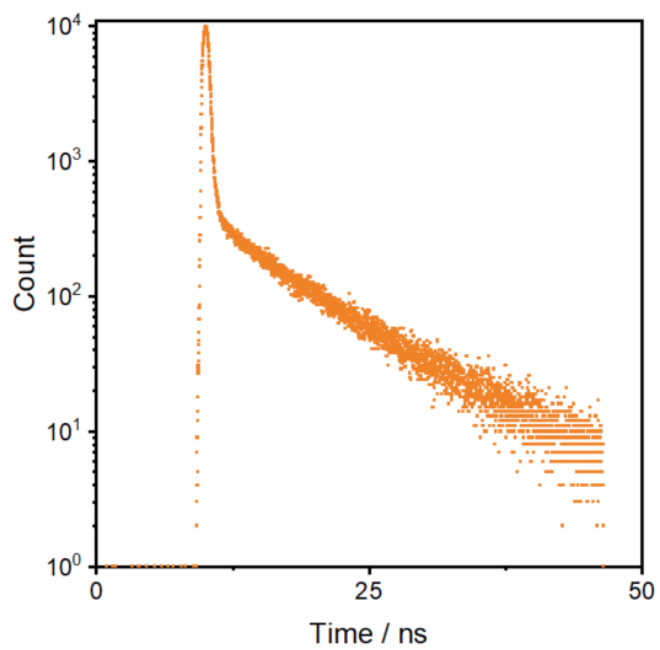

**Figure S17.** Photoluminescence decay profile of **1** dispersed in 1wt% polystyrene film.

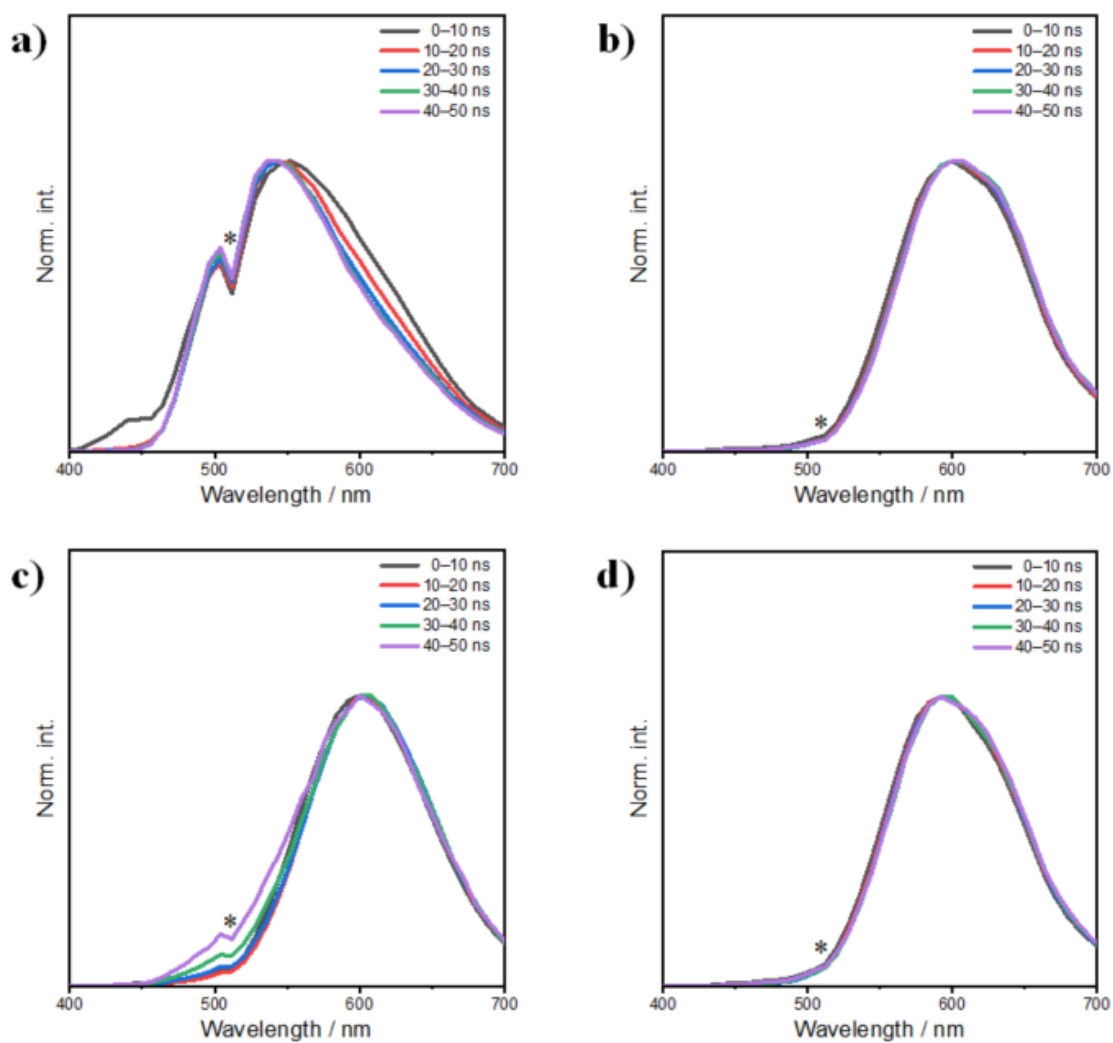

**Figure S18.** Time resolved emission spectra (TRES) of a) **1a**, b) **1b** c) **1c** and d) **1d**. TRES measurements were performed on 8 nm of detection steps and 60 seconds of integration time. \*: noise from instrument setup.

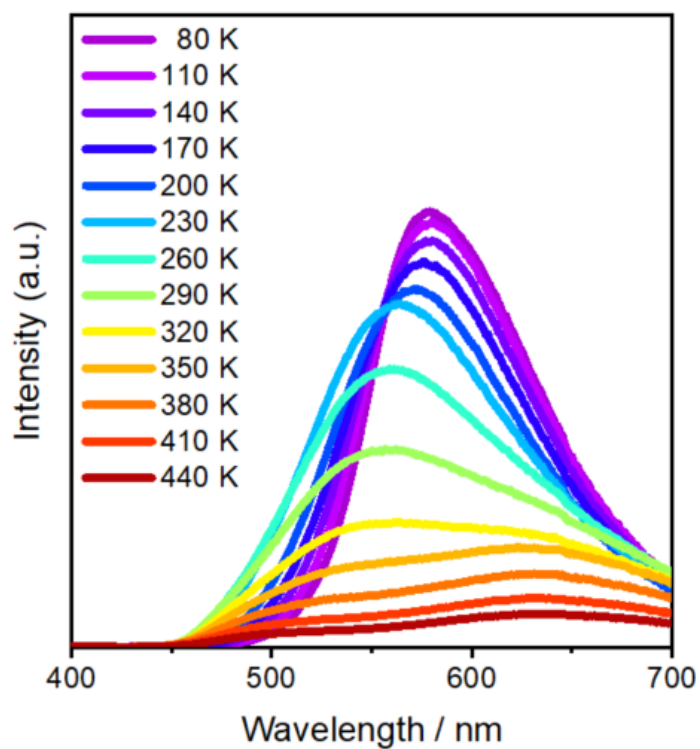

**Figure S19.** VT-PL spectra of **1b** in 2nd heating from 80 K to 440 K.

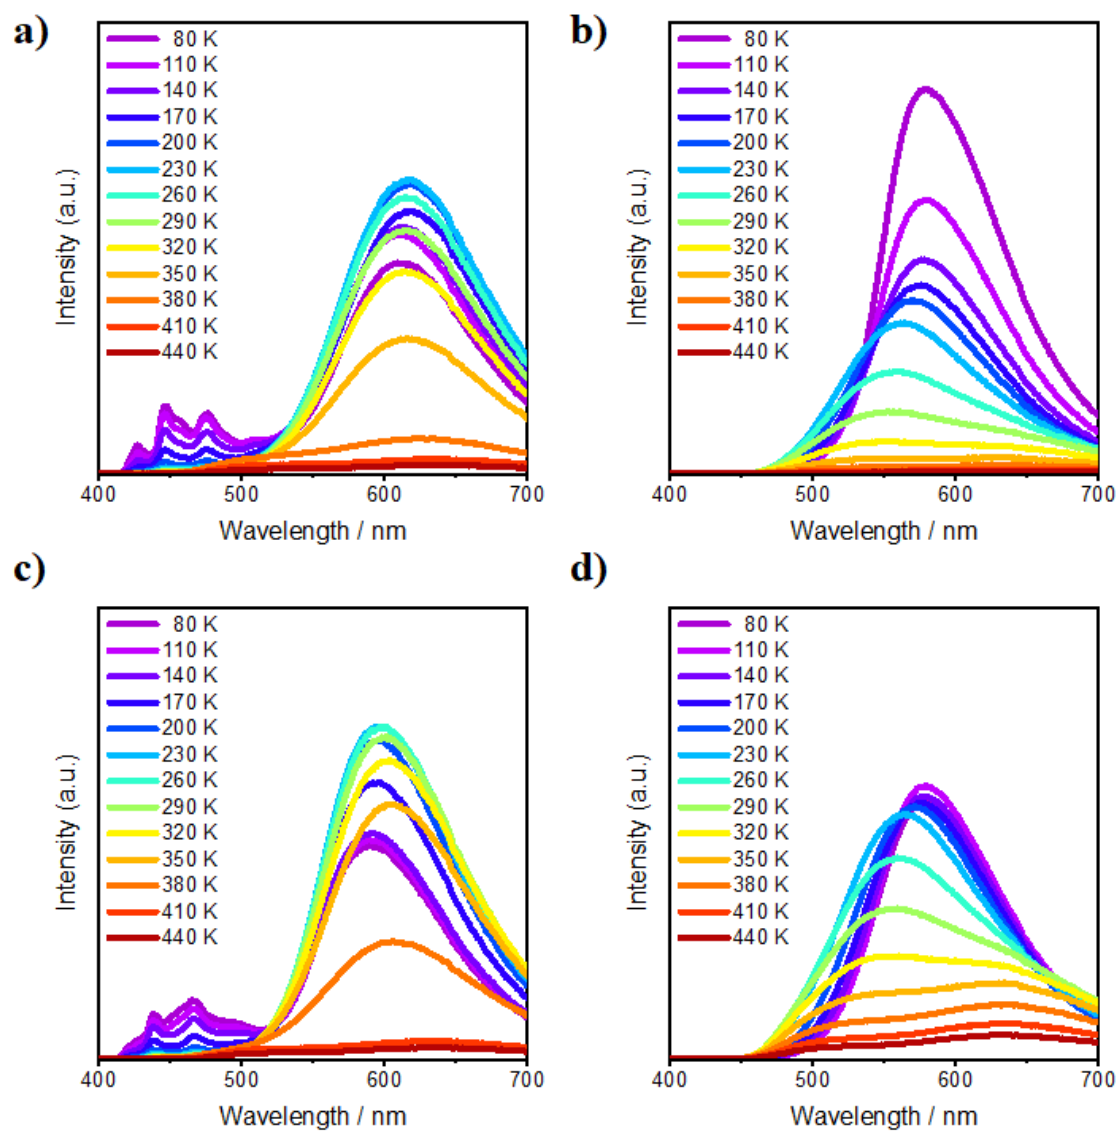

**Figure S20.** VT-PL spectra of a) **1c** in 1st and b) 2nd heating from 80 K to 440 K and c) **1d** in 1st and d) 2nd heating from 80K to 440 K.

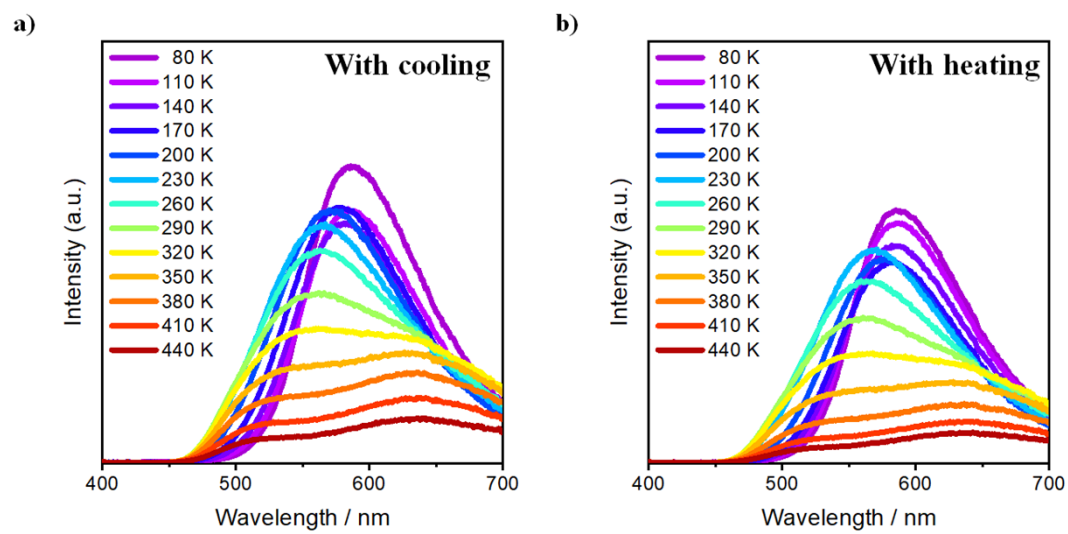

**Figure S21.** VT-PL spectra of **1a** with a) cooling from 440 K to 80 K, followed by b) heating from 80 K to 440 K.

## References

- (1) Sheldrick, G. M. *Acta Crystallogr. Sect. A Found. Crystallogr.* **2015**, *71*, 3–8.
- (2) Sheldrick, G. M. *Acta Crystallogr. Sect. C Struct. Chem.* **2015**, *71*, 3–8.
- (3) Dolomanov, O. V.; Bourhis, L. J.; Gildea, R. J.; Howard, J. A. K.; Puschmann, H. *J. Appl. Crystallogr.* **2009**, *42*, 339–341.
- (4) Farrugia, L. J. *J. Appl. Crystallogr.* **1997**, *30*, 565.
- (5) Ou, Y. P.; Jiang, C.; Wu, D.; Xia, J.; Yin, J.; Jin, S.; Yu, G. A.; Liu, S. H. *Organometallics* **2011**, *30*, 5763–5770.
- (6) Mataga, N.; Kaifu, Y.; Koizumi, M. *Bull. Chem. Soc. Jpn.* **1956**, *29*, 465–470.
- (7) Lippert, E. *Berichte der Bunsengesellschaft für physikalische Chemie* **1957**, *61*, 962–975.
- (8) Gaussian 16, Revision B.01, M. J. Frisch, G. W. Trucks, H. B. Schlegel, G. E. Scuseria, M. A. Robb, J. R. Cheeseman, G. Scalmani, V. Barone, G. A. Petersson, H. Nakatsuji, X. Li, M. Caricato, A. V. Marenich, J. Bloino, B. G. Janesko, R. Gomperts, B. Mennucci, H. P. Hratchian, J. V. Ortiz, A. F. Izmaylov, J. L. Sonnenberg, D. Williams-Young, F. Ding, F. Lipparini, F. Egidi, J. Goings, B. Peng, A. Petrone, T. Henderson, D. Ranasinghe, V. G. Zakrzewski, J. Gao, N. Rega, G. Zheng, W. Liang, M. Hada, M. Ehara, K. Toyota, R. Fukuda, J. Hasegawa, M. Ishida, T. Nakajima, Y. Honda, O. Kitao, H. Nakai, T. Vreven, K. Throssell, J. A. Montgomery, Jr., J. E. Peralta, F. Ogliaro, M. J. Bearpark, J. J. Heyd, E. N. Brothers, K. N. Kudin, V. N. Staroverov, T. A. Keith, R. Kobayashi, J. Normand, K. Raghavachari, A. P. Rendell, J. C. Burant, S. S. Iyengar, J. Tomasi, M. Cossi, J. M. Millam, M. Klene, C. Adamo, R. Cammi, J. W. Ochterski, R. L. Martin, K. Morokuma, O. Farkas, J. B. Foresman, and D. J. Fox, Gaussian, Inc., Wallingford CT, 2016.
